# Supplementary material for: How does multiple substrate binding lead to substrate inhibition of CYP2D6 metabolizing dextromethorphan? A theoretical study
Source: Royal Society of Chemistry journal article supplement (doi:10.1039/d2cp05634h), 2023-01-01
Supplement: d2cp05634h1.pdf [file d2cp05634h1.pdf]

## Supporting Information

# How Does Multiple Substrate Binding Lead to Substrate Inhibition of CYP2D6 Metabolizing Dextromethorphan? A Theoretical Study

Min-Zhang Sun,<sup>b</sup> Ling-Shan Lyu,<sup>b</sup> Qing-Chuan Zheng<sup>\*a,b</sup>

a. School of Pharmaceutical Sciences, Jilin University, Changchun, 130023, China

b. Institute of Theoretical Chemistry, College of Chemistry, Jilin University,  
Changchun, 130023, China.

**This supporting information contains six supplementary figures (Figure S1-S6), one supplementary table (Table S1) and the cartesian coordinates of all states in the QM calculation.**

## Six supplementary figures

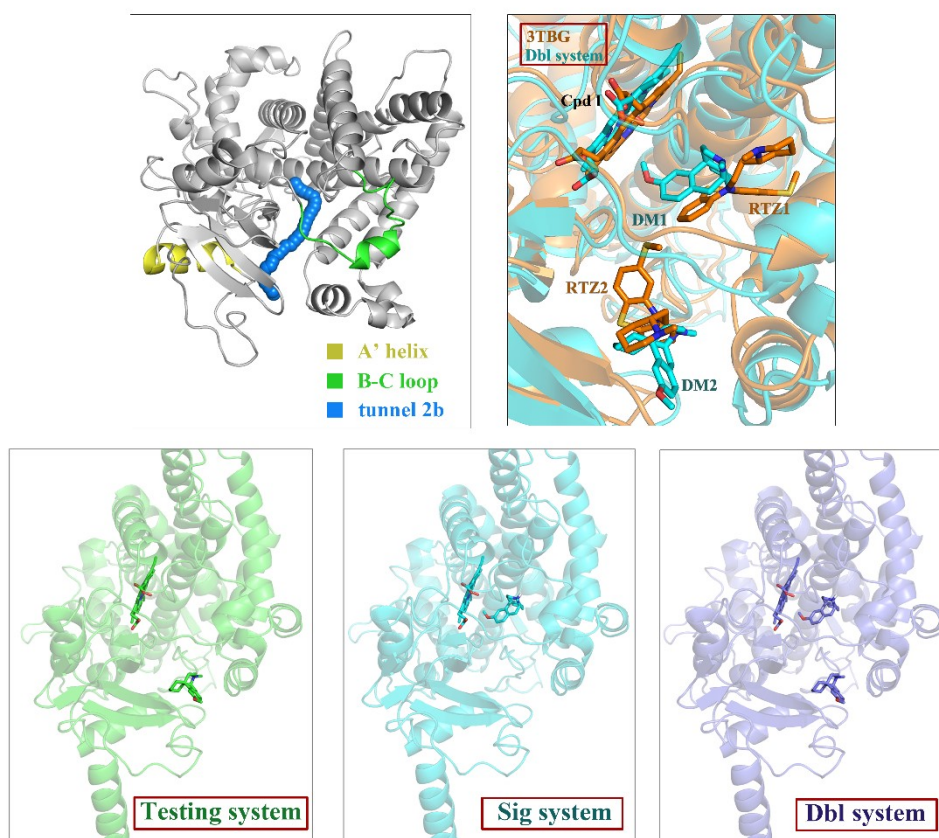

**Figure S1.** The upper figure shows the location of tunnel 2b of CYP2D6, and the comparison of the positions of two molecules bound in **Dbl system** and crystal structure (PDB code: 3TBG). The key secondary structure, A' helix and B-C loop has been drawn in yellow and blue, respectively. The lower three figures show the initial structure of **Sig system**, **Dbl system** and **Testing system**.

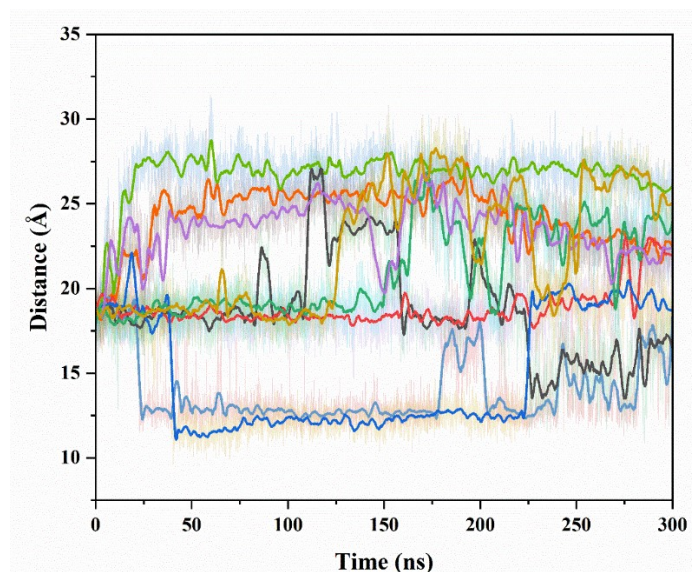

**Figure S2.** The distance between the reactive sites for the **Testing system**. The results of the nine parallel trajectories are shown in different colors.

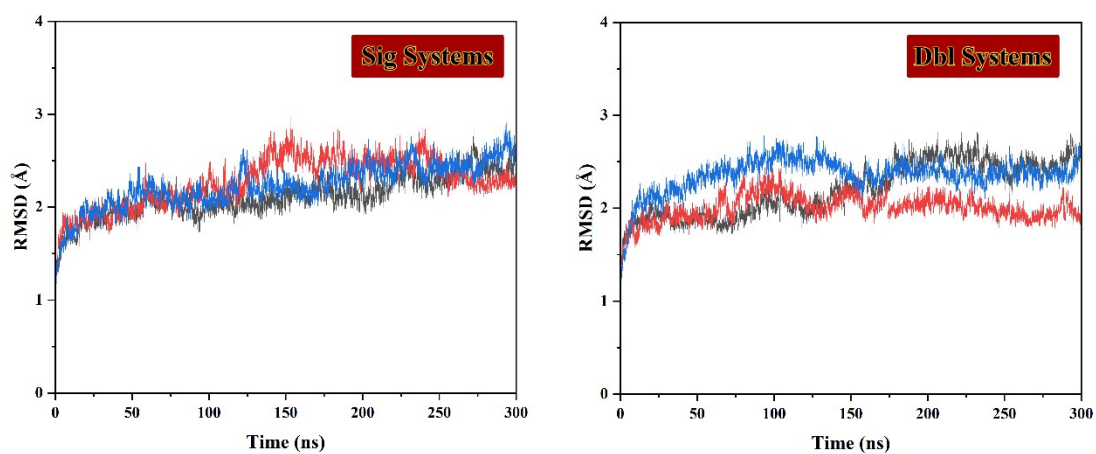

**Figure S3.** The RMSD for the **Sig system** and **Dbl system**. The results of three parallel trajectories for these two systems are shown in red, blue and black, respectively.

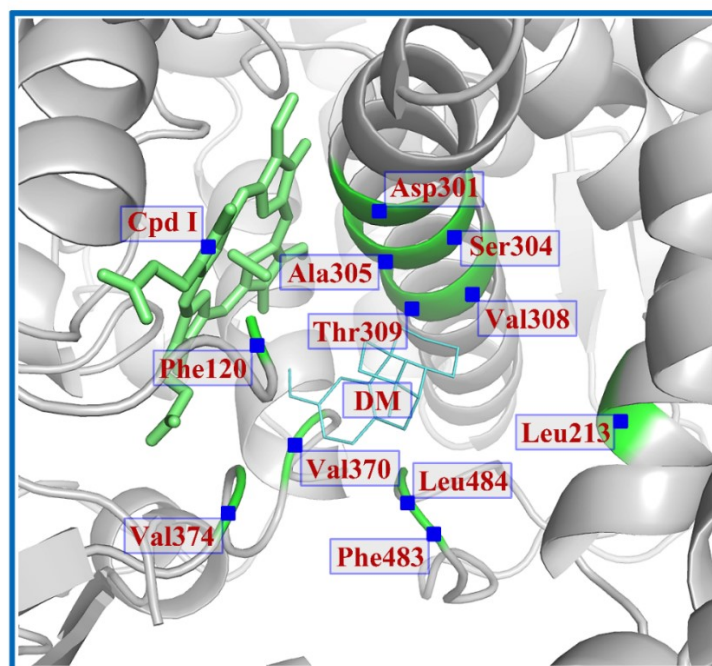

**Figure S4.** The position of residues that contribute significantly in the residue decomposition energy results.

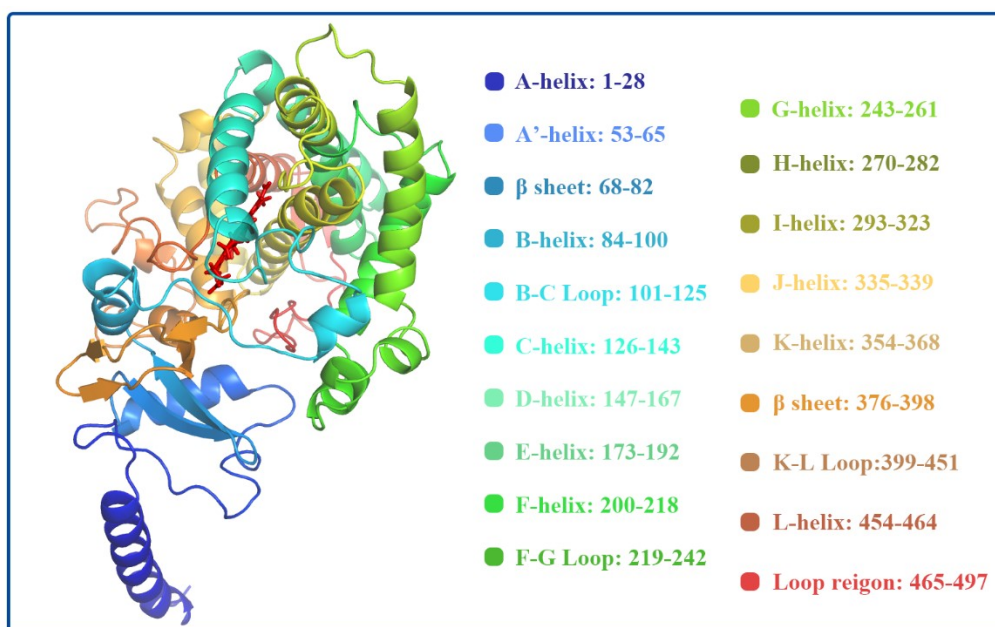

**Figure S5.** The residue numbers that corresponds to different secondary structures for CYP2D6.

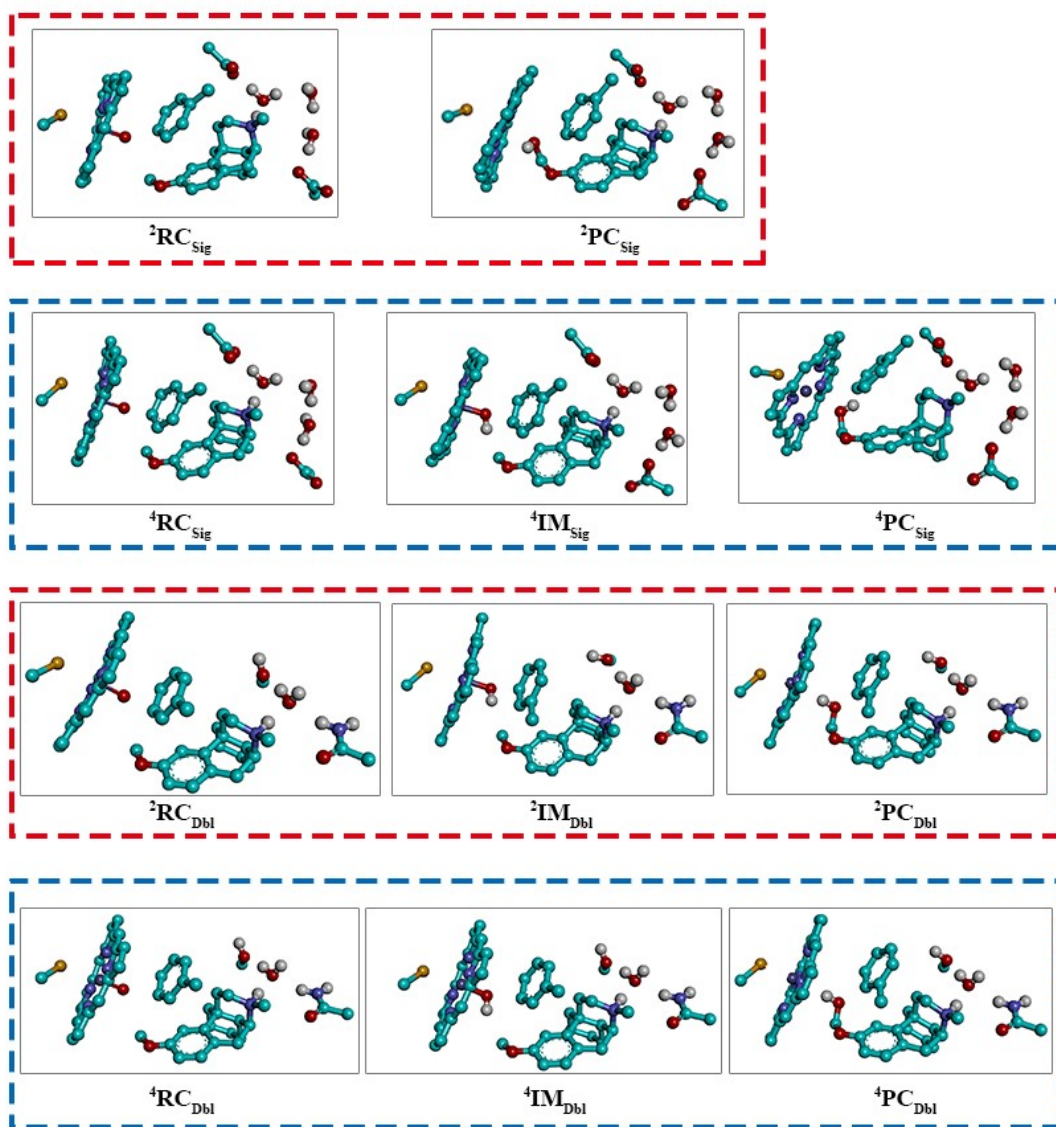

**Figure S6.** The corresponding structures of reactant complex (RC), intermediate (IM), and product complex (PC) of the Sig system and Dbl system.

## One supplementary table

Table S1. Binding free energy (kcal/mol).

|                             | Sig system         | Dbl system         |
|-----------------------------|--------------------|--------------------|
| $E_{\text{ele}}$            | $-94.59 \pm 6.03$  | $-82.47 \pm 4.91$  |
| $E_{\text{vdw}}$            | $-39.42 \pm 1.36$  | $-38.36 \pm 1.77$  |
| $G_{\text{gb}}$             | $107.09 \pm 5.95$  | $98.56 \pm 4.73$   |
| $G_{\text{sa}}$             | $-4.74 \pm 0.12$   | $-4.92 \pm 0.18$   |
| $\Delta G_{\text{gas}}$     | $-134.02 \pm 6.49$ | $-120.83 \pm 5.26$ |
| $\Delta G_{\text{sol}}$     | $102.35 \pm 5.90$  | $93.64 \pm 4.70$   |
| $\Delta G_{\text{binding}}$ | $-31.67 \pm 1.76$  | $-27.19 \pm 2.06$  |

$E_{\text{ele}}$ ,  $E_{\text{vdw}}$ : electrostatic, and van der waals energy in the gas phase

$G_{\text{gb}}$ : polar contribution to solvation energy

$G_{\text{sa}}$ : nonpolar solvation energy

$G_{\text{gas}}$ : gas phase energy contributions

$G_{\text{sol}}$ : solvation free energy components

## The cartesian coordinates of all states in the QM calculation in this study

The cartesian coordinates of the reactant complex in doublet spin state of **Sig** system

$^2\text{RC}_{\text{Sig}}$

|   |           |          |          |
|---|-----------|----------|----------|
| C | -2.21593  | 3.20451  | -2.66898 |
| C | -1.14743  | 2.235    | -2.22399 |
| C | -0.48195  | 2.40568  | -1.00309 |
| C | -0.81507  | 1.11764  | -3.00628 |
| C | 0.48288   | 1.48944  | -0.576   |
| C | 0.14641   | 0.2017   | -2.58392 |
| C | 0.8004    | 0.38495  | -1.36432 |
| H | -2.53735  | 3.87243  | -1.86641 |
| H | -3.09646  | 2.66643  | -3.03969 |
| H | -0.74886  | 3.24987  | -0.375   |
| H | -1.33496  | 0.95865  | -3.94893 |
| H | 0.99497   | 1.63336  | 0.3706   |
| H | 0.37468   | -0.66949 | -3.19045 |
| H | 1.55998   | -0.31074 | -1.03248 |
| C | -9.60848  | -3.48059 | 1.37266  |
| C | -9.30424  | -2.65158 | 0.11679  |
| O | -10.06261 | -2.76556 | -0.86637 |
| O | -8.29631  | -1.86938 | 0.18892  |
| H | -9.86511  | -2.80051 | 2.19231  |
| H | -8.71409  | -4.03383 | 1.67833  |
| C | -1.894    | 5.66134  | 1.07957  |
| C | -3.09974  | 4.6772   | 0.87429  |
| O | -3.55844  | 4.07393  | 1.89372  |
| O | -3.52838  | 4.55634  | -0.30219 |

|   |          |          |          |
|---|----------|----------|----------|
| H | -2.19649 | 6.6635   | 0.75954  |
| H | -1.05989 | 5.35543  | 0.43942  |
| C | 8.02244  | 0.22853  | -1.64984 |
| S | 7.3654   | 0.71785  | -0.02854 |
| H | 7.99558  | -0.86544 | -1.71546 |
| H | 9.05028  | 0.57337  | -1.77928 |
| N | 4.85719  | -1.17804 | -1.47822 |
| N | 5.51402  | -1.64228 | 1.26264  |
| N | 4.10693  | 1.56165  | -0.78311 |
| C | 3.88683  | 0.49002  | -2.99211 |
| C | 5.62845  | -3.30305 | -0.5622  |
| C | 5.67777  | -0.61291 | 3.4798   |
| C | 4.09938  | 3.24551  | 1.00551  |
| C | 4.4426   | -0.75987 | -2.71702 |
| C | 5.69078  | -2.91358 | 0.76974  |
| C | 5.39952  | 0.71418  | 3.13381  |
| C | 3.76289  | 2.79628  | -0.2738  |
| O | 3.20023  | -0.50902 | 0.63253  |
| C | 4.62574  | -1.83677 | -3.67823 |
| C | 5.96902  | -3.8274  | 1.85224  |
| C | 5.47668  | 1.85016  | 4.03891  |
| C | 3.06187  | 3.57662  | -1.29963 |
| C | 5.13696  | -2.92051 | -3.0127  |
| C | 5.95313  | -3.10608 | 3.00459  |
| C | 5.06678  | 2.96773  | 3.36428  |
| C | 3.04277  | 2.79419  | -2.41568 |
| C | 5.25217  | -2.48983 | -1.62193 |
| C | 5.68816  | -1.71744 | 2.62564  |
| C | 4.70493  | 2.49235  | 2.01691  |
| C | 3.69612  | 1.53933  | -2.09119 |



|    |          |          |          |
|----|----------|----------|----------|
| N  | 4.96383  | 1.14343  | 1.9069   |
| Fe | 4.70976  | -0.06019 | 0.2668   |
| H  | 3.53557  | 0.65641  | -4.00518 |
| H  | 5.85673  | -4.34074 | -0.78304 |
| H  | 5.91731  | -0.79984 | 4.52212  |
| H  | 3.84662  | 4.27417  | 1.24315  |
| O  | 0.47083  | -3.18377 | -1.25719 |
| N  | -4.98875 | 0.92663  | -0.39922 |
| C  | -3.27483 | -0.88727 | 1.10346  |
| C  | -4.82146 | -0.97696 | 1.14518  |
| C  | -5.39836 | -0.51173 | -0.19497 |
| C  | -2.88898 | 0.59289  | 0.86861  |
| C  | -2.73319 | -1.34015 | 2.47413  |
| C  | -5.32251 | -2.37744 | 1.5301   |
| C  | -2.7238  | -1.69888 | -0.07485 |
| C  | -4.9466  | -1.43561 | -1.32421 |
| C  | -3.50876 | 1.1619   | -0.39856 |
| C  | -3.21028 | -2.74129 | 2.87039  |
| C  | -4.74351 | -2.80968 | 2.8811   |
| C  | -3.50283 | -1.89294 | -1.22834 |
| C  | -1.38956 | -2.13715 | -0.06491 |
| C  | -5.65106 | 1.60693  | -1.53685 |
| C  | -2.92289 | -2.53387 | -2.33316 |
| C  | -0.82583 | -2.76174 | -1.17709 |
| C  | -1.60725 | -2.96954 | -2.32089 |
| C  | 1.28643  | -3.07773 | -0.0951  |
| H  | -5.1661  | -0.27329 | 1.91545  |
| H  | -6.48859 | -0.50635 | -0.14878 |
| H  | -1.80414 | 0.69085  | 0.78049  |
| H  | -3.20328 | 1.20163  | 1.7237   |

|   |          |          |          |
|---|----------|----------|----------|
| H | -3.09136 | -0.61687 | 3.21848  |
| H | -1.64029 | -1.27483 | 2.49928  |
| H | -5.00758 | -3.10216 | 0.76995  |
| H | -6.41711 | -2.37613 | 1.52907  |
| H | -5.12508 | -0.97018 | -2.29992 |
| H | -5.6217  | -2.29913 | -1.29406 |
| H | -3.37867 | 2.2447   | -0.43919 |
| H | -3.08643 | 0.70881  | -1.29519 |
| H | -2.80589 | -3.00897 | 3.85429  |
| H | -2.81707 | -3.47429 | 2.15436  |
| H | -5.08061 | -3.82363 | 3.128    |
| H | -5.12759 | -2.14923 | 3.67158  |
| H | -0.77884 | -1.95135 | 0.80737  |
| H | -6.73072 | 1.48971  | -1.42146 |
| H | -5.32128 | 1.18489  | -2.48739 |
| H | -5.37284 | 2.66219  | -1.48221 |
| H | -3.52437 | -2.68468 | -3.22696 |
| H | -1.15851 | -3.45506 | -3.18117 |
| H | 2.26687  | -3.46442 | -0.37722 |
| H | 0.8762   | -3.67587 | 0.72978  |
| H | 1.41034  | -2.04204 | 0.23161  |
| H | -5.33618 | 1.49978  | 0.45929  |
| O | -5.68525 | 2.47399  | 1.49793  |
| H | -6.47475 | 2.9747   | 1.2284   |
| H | -4.91636 | 3.13923  | 1.61682  |
| O | -8.63019 | 3.35731  | 0.11695  |
| H | -8.32069 | 3.59639  | -0.76443 |
| H | -8.83513 | 2.39884  | 0.04884  |
| O | -9.00622 | 0.63123  | 0.27252  |
| H | -8.76486 | 0.56875  | 1.20504  |

|   |           |          |          |
|---|-----------|----------|----------|
| H | -8.79629  | -0.2914  | -0.03854 |
| H | -10.43528 | -4.17426 | 1.2046   |
| H | -1.57029  | 5.68698  | 2.12239  |
| H | -1.8536   | 3.81496  | -3.50822 |
| H | 5.38682   | -3.90235 | -3.38828 |
| H | 4.37657   | -1.75646 | -4.72867 |
| H | 2.5911    | 3.01157  | -3.37404 |
| H | 2.65619   | 4.56782  | -1.15604 |
| H | 5.8069    | 1.78012  | 5.06756  |
| H | 6.144     | -4.88776 | 1.72672  |
| H | 6.12363   | -3.44352 | 4.01813  |
| H | 4.97493   | 3.98628  | 3.71291  |
| H | 7.38195   | 0.61709  | -2.44668 |

The cartesian coordinates of the transition state in doublet spin state of **Sig system**

**<sup>2</sup>TS<sub>Sig</sub>**

|   |          |          |          |
|---|----------|----------|----------|
| C | -2.28784 | 3.68966  | -2.45007 |
| C | -1.30366 | 2.56573  | -2.24325 |
| C | -0.50198 | 2.51584  | -1.09444 |
| C | -1.16053 | 1.53893  | -3.1888  |
| C | 0.4167   | 1.48277  | -0.89974 |
| C | -0.2438  | 0.50434  | -2.99978 |
| C | 0.55448  | 0.47691  | -1.85552 |
| H | -2.63711 | 4.12174  | -1.50795 |
| H | -3.16312 | 3.34109  | -3.01058 |
| H | -0.61995 | 3.2904   | -0.34143 |
| H | -1.78639 | 1.55109  | -4.07891 |
| H | 1.03201  | 1.44379  | -0.00711 |
| H | -0.16272 | -0.29056 | -3.73632 |

|   |           |          |          |
|---|-----------|----------|----------|
| H | 1.27481   | -0.31556 | -1.69717 |
| C | -9.80058  | -3.63467 | -0.08729 |
| C | -8.3574   | -3.0508  | -0.12633 |
| O | -7.40054  | -3.8449  | -0.03472 |
| O | -8.25884  | -1.78265 | -0.25777 |
| H | -10.34248 | -3.34779 | -0.99573 |
| H | -10.34752 | -3.20893 | 0.76142  |
| C | -2.18933  | 5.42444  | 1.69389  |
| C | -3.36606  | 4.4787   | 1.27735  |
| O | -3.88482  | 3.74449  | 2.17556  |
| O | -3.70121  | 4.49767  | 0.06758  |
| H | -2.27179  | 6.37253  | 1.15642  |
| H | -1.24004  | 4.95698  | 1.40444  |
| C | 7.91829   | 0.59976  | -1.44608 |
| S | 7.03923   | 1.03114  | 0.0893   |
| H | 7.90982   | -0.47796 | -1.62293 |
| H | 8.94517   | 0.97101  | -1.38766 |
| N | 4.71303   | -0.84989 | -1.69116 |
| N | 5.15227   | -1.81875 | 0.93172  |
| N | 3.96088   | 1.7542   | -0.55673 |
| C | 3.87353   | 1.09782  | -2.9281  |
| C | 5.43198   | -3.11396 | -1.14812 |
| C | 5.30822   | -1.16548 | 3.29452  |
| C | 3.80738   | 3.07582  | 1.50711  |
| C | 4.41091   | -0.19141 | -2.85416 |
| C | 5.40471   | -2.97594 | 0.23726  |
| C | 5.03305   | 0.20388  | 3.19198  |
| C | 3.56274   | 2.87131  | 0.14756  |
| O | 2.79598   | -0.39259 | 0.41184  |
| C | 4.68531   | -1.05659 | -3.98981 |

|    |          |          |          |
|----|----------|----------|----------|
| C  | 5.69966  | -4.05105 | 1.15378  |
| C  | 5.07251  | 1.15558  | 4.29321  |
| C  | 2.90716  | 3.81775  | -0.75768 |
| C  | 5.14445  | -2.25497 | -3.50904 |
| C  | 5.64986  | -3.53024 | 2.40932  |
| C  | 4.67473  | 2.37497  | 3.81798  |
| C  | 2.96983  | 3.25976  | -1.99868 |
| C  | 5.13309  | -2.11315 | -2.05889 |
| C  | 5.33196  | -2.11118 | 2.2639   |
| C  | 4.36905  | 2.15206  | 2.39427  |
| C  | 3.62403  | 1.97053  | -1.87105 |
| N  | 4.63739  | 0.84629  | 2.05085  |
| Fe | 4.47964  | -0.06046 | 0.20404  |
| H  | 3.59408  | 1.44956  | -3.91611 |
| H  | 5.69998  | -4.08929 | -1.54155 |
| H  | 5.53996  | -1.53391 | 4.28958  |
| H  | 3.52533  | 4.04203  | 1.91393  |
| O  | 0.99636  | -2.85092 | -0.99581 |
| N  | -5.09765 | 0.5063   | -0.40838 |
| C  | -2.99571 | -0.75199 | 1.19036  |
| C  | -4.49545 | -1.12055 | 1.33914  |
| C  | -5.2034  | -0.95111 | -0.00438 |
| C  | -2.90919 | 0.72793  | 0.74706  |
| C  | -2.32799 | -0.9017  | 2.5725   |
| C  | -4.69396 | -2.53063 | 1.91655  |
| C  | -2.34261 | -1.61641 | 0.10466  |
| C  | -4.62123 | -1.91295 | -1.03726 |
| C  | -3.69286 | 1.02279  | -0.52686 |
| C  | -2.51503 | -2.29815 | 3.17659  |
| C  | -4.00462 | -2.65658 | 3.2793   |

|   |          |          |          |
|---|----------|----------|----------|
| C | -3.11841 | -2.10473 | -0.96577 |
| C | -0.95566 | -1.84409 | 0.10729  |
| C | -5.92305 | 0.84912  | -1.59238 |
| C | -2.48075 | -2.80594 | -1.99939 |
| C | -0.35299 | -2.56492 | -0.92113 |
| C | -1.11393 | -3.04194 | -1.99076 |
| C | 1.83023  | -2.70586 | 0.09008  |
| H | -4.93575 | -0.40075 | 2.04284  |
| H | -6.27767 | -1.15639 | 0.08152  |
| H | -1.86861 | 1.00369  | 0.56279  |
| H | -3.27459 | 1.3797   | 1.54834  |
| H | -2.79039 | -0.15947 | 3.23534  |
| H | -1.26687 | -0.63307 | 2.52264  |
| H | -4.26422 | -3.27401 | 1.23622  |
| H | -5.76165 | -2.7622  | 1.97243  |
| H | -4.90694 | -1.61754 | -2.05256 |
| H | -5.14511 | -2.86379 | -0.86627 |
| H | -3.76897 | 2.10496  | -0.66265 |
| H | -3.23192 | 0.57171  | -1.40772 |
| H | -2.03988 | -2.34269 | 4.16438  |
| H | -2.00633 | -3.03935 | 2.54645  |
| H | -4.12643 | -3.67334 | 3.67153  |
| H | -4.4883  | -1.9803  | 3.99819  |
| H | -0.34176 | -1.41787 | 0.89006  |
| H | -6.94737 | 0.51465  | -1.413   |
| H | -5.51358 | 0.3827   | -2.48961 |
| H | -5.89784 | 1.93514  | -1.70465 |
| H | -3.08027 | -3.17804 | -2.82654 |
| H | -0.62176 | -3.59031 | -2.78678 |
| H | 2.72474  | -3.30691 | -0.07211 |

|   |          |          |          |
|---|----------|----------|----------|
| H | 1.34654  | -2.86907 | 1.05698  |
| H | 2.35104  | -1.48928 | 0.19111  |
| H | -5.52003 | 1.11431  | 0.37885  |
| O | -5.95969 | 2.2058   | 1.32485  |
| H | -6.74271 | 2.7247   | 1.07958  |
| H | -5.2221  | 2.8479   | 1.59573  |
| O | -8.83925 | 3.31935  | -0.02723 |
| H | -8.28541 | 3.45318  | -0.80593 |
| H | -8.98575 | 2.34748  | -0.02169 |
| O | -9.19086 | 0.61005  | -0.38925 |
| H | -9.75133 | 0.51095  | -1.16699 |
| H | -8.89844 | -0.3335  | -0.19954 |
| H | -9.77582 | -4.72263 | -0.00058 |
| H | -2.17627 | 5.59341  | 2.77353  |
| H | -1.83189 | 4.49129  | -3.04913 |
| H | 5.43681  | -3.14349 | -4.05017 |
| H | 4.53158  | -0.76748 | -5.02163 |
| H | 2.57144  | 3.65043  | -2.92508 |
| H | 2.47499  | 4.76255  | -0.45996 |
| H | 5.36674  | 0.90129  | 5.30356  |
| H | 5.92333  | -5.0671  | 0.85685  |
| H | 5.8303   | -4.0255  | 3.35408  |
| H | 4.56306  | 3.31295  | 4.34253  |
| H | 7.4234   | 1.09483  | -2.28926 |

The cartesian coordinates of the product complex in doublet spin state of **Sig system**

${}^2\text{PC}_{\text{Sig}}$

|   |          |         |          |
|---|----------|---------|----------|
| C | -2.32934 | 3.82166 | -2.31078 |
| C | -1.44433 | 2.60361 | -2.316   |

|   |           |          |          |
|---|-----------|----------|----------|
| C | -0.48993  | 2.41099  | -1.30649 |
| C | -1.54834  | 1.62507  | -3.31454 |
| C | 0.33056   | 1.28359  | -1.29163 |
| C | -0.73153  | 0.49313  | -3.30652 |
| C | 0.21365   | 0.32139  | -2.2958  |
| H | -2.68278  | 4.08709  | -1.30809 |
| H | -3.20543  | 3.67009  | -2.95065 |
| H | -0.4047   | 3.15157  | -0.51571 |
| H | -2.29153  | 1.74977  | -4.0989  |
| H | 1.05264   | 1.13906  | -0.4961  |
| H | -0.84275  | -0.2619  | -4.08012 |
| H | 0.83399   | -0.56722 | -2.27724 |
| C | -9.80408  | -3.72806 | -0.63738 |
| C | -8.36474  | -3.13576 | -0.49177 |
| O | -7.41626  | -3.93059 | -0.3573  |
| O | -8.26615  | -1.85842 | -0.52936 |
| H | -10.24928 | -3.39718 | -1.58291 |
| H | -10.44354 | -3.35062 | 0.16856  |
| C | -2.30809  | 5.23044  | 1.95608  |
| C | -3.484    | 4.32343  | 1.45964  |
| O | -4.05015  | 3.56688  | 2.31127  |
| O | -3.77016  | 4.39342  | 0.2406   |
| H | -2.41082  | 6.23024  | 1.52546  |
| H | -1.36228  | 4.80961  | 1.59326  |
| C | 7.89067   | 0.75076  | -1.39339 |
| S | 6.92229   | 0.80905  | 0.19026  |
| H | 7.97806   | -0.27391 | -1.7599  |
| H | 8.87961   | 1.13945  | -1.14041 |
| N | 4.82367   | -0.6436  | -1.80974 |
| N | 5.25759   | -1.80713 | 0.75777  |



|    |          |          |          |
|----|----------|----------|----------|
| N  | 3.92879  | 1.78604  | -0.4863  |
| C  | 3.85566  | 1.32588  | -2.90806 |
| C  | 5.57442  | -2.934   | -1.41913 |
| C  | 5.2568   | -1.39159 | 3.17179  |
| C  | 3.77525  | 2.96299  | 1.66608  |
| C  | 4.44867  | 0.06216  | -2.93078 |
| C  | 5.52666  | -2.90434 | -0.03012 |
| C  | 4.99059  | -0.01853 | 3.15464  |
| C  | 3.52422  | 2.85478  | 0.29572  |
| O  | 2.54415  | -0.74961 | -0.00955 |
| C  | 4.6747   | -0.74724 | -4.11506 |
| C  | 5.73469  | -4.07094 | 0.79559  |
| C  | 4.94014  | 0.83402  | 4.33419  |
| C  | 2.83897  | 3.86256  | -0.53443 |
| C  | 5.17507  | -1.95897 | -3.71336 |
| C  | 5.60662  | -3.68521 | 2.09547  |
| C  | 4.55367  | 2.08434  | 3.94221  |
| C  | 2.89738  | 3.37975  | -1.80977 |
| C  | 5.24763  | -1.88086 | -2.26035 |
| C  | 5.34546  | -2.24036 | 2.06647  |
| C  | 4.33967  | 1.98128  | 2.48514  |
| C  | 3.58537  | 2.1013   | -1.78048 |
| N  | 4.65598  | 0.71299  | 2.04293  |
| Fe | 4.81795  | 0.06798  | 0.1164   |
| H  | 3.54026  | 1.73511  | -3.86218 |
| H  | 5.83659  | -3.88021 | -1.88121 |
| H  | 5.41462  | -1.8416  | 4.14721  |
| H  | 3.47315  | 3.88904  | 2.14543  |
| O  | 1.23957  | -2.6499  | -0.38586 |
| N  | -5.12189 | 0.35035  | -0.46588 |

|   |          |          |          |
|---|----------|----------|----------|
| C | -3.0231  | -0.62243 | 1.3198   |
| C | -4.50077 | -1.0877  | 1.42067  |
| C | -5.13884 | -1.08189 | 0.03293  |
| C | -2.99972 | 0.8134   | 0.74658  |
| C | -2.43933 | -0.60043 | 2.74759  |
| C | -4.63511 | -2.45581 | 2.10559  |
| C | -2.24954 | -1.52715 | 0.35762  |
| C | -4.42295 | -2.0613  | -0.89835 |
| C | -3.7497  | 0.9488   | -0.57405 |
| C | -2.55969 | -1.9525  | 3.46017  |
| C | -4.02194 | -2.41875 | 3.50991  |
| C | -2.92017 | -2.16465 | -0.70143 |
| C | -0.85268 | -1.64916 | 0.46751  |
| C | -5.92631 | 0.54861  | -1.69632 |
| C | -2.16835 | -2.9319  | -1.60265 |
| C | -0.13234 | -2.42589 | -0.43203 |
| C | -0.79321 | -3.07597 | -1.47643 |
| C | 2.07565  | -1.98671 | 0.52129  |
| H | -5.0311  | -0.34815 | 2.03491  |
| H | -6.19993 | -1.35829 | 0.0709   |
| H | -1.96734 | 1.12579  | 0.56704  |
| H | -3.41876 | 1.51219  | 1.47708  |
| H | -2.99783 | 0.15714  | 3.31107  |
| H | -1.40016 | -0.25225 | 2.73876  |
| H | -4.11956 | -3.22077 | 1.51416  |
| H | -5.68963 | -2.74939 | 2.13239  |
| H | -4.63975 | -1.82589 | -1.94608 |
| H | -4.91151 | -3.02994 | -0.73016 |
| H | -3.88748 | 2.00962  | -0.79507 |
| H | -3.22744 | 0.4631   | -1.40018 |

|   |          |          |          |
|---|----------|----------|----------|
| H | -2.14803 | -1.87714 | 4.47424  |
| H | -1.95802 | -2.70087 | 2.92811  |
| H | -4.0918  | -3.40702 | 3.98009  |
| H | -4.59804 | -1.72677 | 4.13977  |
| H | -0.3412  | -1.10698 | 1.25143  |
| H | -6.91444 | 0.11176  | -1.54266 |
| H | -5.42793 | 0.08531  | -2.54949 |
| H | -6.01055 | 1.62391  | -1.86691 |
| H | -2.68135 | -3.43076 | -2.42144 |
| H | -0.21699 | -3.67703 | -2.17196 |
| H | 2.91416  | -2.66391 | 0.69151  |
| H | 1.58414  | -1.7471  | 1.46616  |
| H | 2.78564  | -0.91754 | -0.9365  |
| H | -5.59334 | 0.96631  | 0.28413  |
| O | -6.04117 | 2.01796  | 1.28138  |
| H | -6.84369 | 2.52324  | 1.07189  |
| H | -5.33649 | 2.66734  | 1.61353  |
| O | -8.91143 | 3.20833  | -0.02423 |
| H | -8.32375 | 3.40562  | -0.76379 |
| H | -9.05607 | 2.23898  | -0.10729 |
| O | -9.23135 | 0.53237  | -0.60033 |
| H | -9.77806 | 0.46162  | -1.39056 |
| H | -8.93562 | -0.41624 | -0.44229 |
| H | -9.77538 | -4.81887 | -0.60533 |
| H | -2.27365 | 5.28568  | 3.04687  |
| H | -1.7875  | 4.68915  | -2.71423 |
| H | 5.44196  | -2.82058 | -4.30847 |
| H | 4.44941  | -0.42037 | -5.12211 |
| H | 2.48443  | 3.82112  | -2.70678 |
| H | 2.39501  | 4.77582  | -0.16558 |

|   |         |          |          |
|---|---------|----------|----------|
| H | 5.16526 | 0.49224  | 5.33643  |
| H | 5.94028 | -5.06034 | 0.40859  |
| H | 5.69883 | -4.27722 | 2.99556  |
| H | 4.38195 | 2.9694   | 4.53774  |
| H | 7.43257 | 1.37859  | -2.16033 |

The cartesian coordinates of the reactant complex in quartet spin state of **Sig system**

**<sup>4</sup>RC<sub>Sig</sub>**

|   |           |          |          |
|---|-----------|----------|----------|
| C | -2.20558  | 3.20617  | -2.65641 |
| C | -1.13502  | 2.23259  | -2.22507 |
| C | -0.46773  | 2.38794  | -1.00305 |
| C | -0.80066  | 1.12721  | -3.02337 |
| C | 0.50146   | 1.46923  | -0.59102 |
| C | 0.1657    | 0.20934  | -2.61651 |
| C | 0.82243   | 0.37799  | -1.39632 |
| H | -2.52104  | 3.87026  | -1.84839 |
| H | -3.08942  | 2.67162  | -3.02426 |
| H | -0.73626  | 3.22234  | -0.36249 |
| H | -1.32201  | 0.97964  | -3.96705 |
| H | 1.01393   | 1.6003   | 0.35719  |
| H | 0.39541   | -0.65238 | -3.23602 |
| H | 1.58463   | -0.3202  | -1.07569 |
| C | -9.62129  | -3.46633 | 1.36367  |
| C | -9.30257  | -2.63764 | 0.11059  |
| O | -10.04784 | -2.75369 | -0.88183 |
| O | -8.29634  | -1.85387 | 0.19637  |
| H | -9.88816  | -2.78611 | 2.17994  |
| H | -8.73039  | -4.01897 | 1.68056  |
| C | -1.88238  | 5.65578  | 1.09675  |

|   |          |          |          |
|---|----------|----------|----------|
| C | -3.09114 | 4.67608  | 0.88924  |
| O | -3.55287 | 4.07299  | 1.90728  |
| O | -3.51698 | 4.55621  | -0.28839 |
| H | -2.16764 | 6.6514   | 0.74291  |
| H | -1.03652 | 5.32488  | 0.48474  |
| C | 8.02356  | 0.20149  | -1.62831 |
| S | 7.2717   | 0.90679  | -0.13184 |
| H | 7.97758  | -0.8906  | -1.60125 |
| H | 9.05462  | 0.54269  | -1.74374 |
| N | 4.85426  | -1.19795 | -1.46116 |
| N | 5.47266  | -1.68124 | 1.27732  |
| N | 4.13695  | 1.55509  | -0.76424 |
| C | 3.96075  | 0.50251  | -2.98687 |
| C | 5.54844  | -3.34744 | -0.54177 |
| C | 5.71535  | -0.63418 | 3.47869  |
| C | 4.07049  | 3.21931  | 1.0408   |
| C | 4.48777  | -0.76116 | -2.70612 |
| C | 5.61654  | -2.95582 | 0.79121  |
| C | 5.42706  | 0.69269  | 3.13906  |
| C | 3.7626   | 2.78028  | -0.24803 |
| O | 3.18533  | -0.51203 | 0.64041  |
| C | 4.6717   | -1.83453 | -3.67152 |
| C | 5.90368  | -3.86792 | 1.87282  |
| C | 5.50913  | 1.82608  | 4.04713  |
| C | 3.07126  | 3.56208  | -1.27914 |
| C | 5.13166  | -2.93756 | -3.00039 |
| C | 5.93899  | -3.13554 | 3.0177   |
| C | 5.06809  | 2.94001  | 3.38652  |
| C | 3.09244  | 2.79553  | -2.40616 |
| C | 5.2174   | -2.52168 | -1.60393 |

|    |          |          |          |
|----|----------|----------|----------|
| C  | 5.68519  | -1.74636 | 2.63337  |
| C  | 4.68942  | 2.46665  | 2.04362  |
| C  | 3.75318  | 1.54408  | -2.08417 |
| N  | 4.96313  | 1.12089  | 1.92282  |
| Fe | 4.70479  | -0.0872  | 0.28601  |
| H  | 3.63688  | 0.67927  | -4.00734 |
| H  | 5.75468  | -4.39011 | -0.76068 |
| H  | 5.98291  | -0.81809 | 4.51483  |
| H  | 3.80039  | 4.24142  | 1.2869   |
| O  | 0.46945  | -3.17541 | -1.27786 |
| N  | -4.98652 | 0.93392  | -0.39652 |
| C  | -3.27231 | -0.8871  | 1.09693  |
| C  | -4.81896 | -0.97604 | 1.1401   |
| C  | -5.39719 | -0.50493 | -0.19745 |
| C  | -2.88599 | 0.59388  | 0.86827  |
| C  | -2.72911 | -1.34637 | 2.46485  |
| C  | -5.32058 | -2.37772 | 1.51993  |
| C  | -2.723   | -1.69348 | -0.08581 |
| C  | -4.94742 | -1.42453 | -1.33093 |
| C  | -3.5063  | 1.16831  | -0.39611 |
| C  | -3.20663 | -2.74889 | 2.85563  |
| C  | -4.73989 | -2.81611 | 2.8682   |
| C  | -3.50352 | -1.88225 | -1.23918 |
| C  | -1.38877 | -2.13185 | -0.07964 |
| C  | -5.64923 | 1.61883  | -1.53128 |
| C  | -2.92488 | -2.51778 | -2.3478  |
| C  | -0.8266  | -2.75169 | -1.19527 |
| C  | -1.60924 | -2.95358 | -2.33925 |
| C  | 1.28492  | -3.07577 | -0.11521 |
| H  | -5.16232 | -0.27534 | 1.91366  |

|   |          |          |          |
|---|----------|----------|----------|
| H | -6.48741 | -0.49919 | -0.1499  |
| H | -1.80109 | 0.69169  | 0.78     |
| H | -3.19956 | 1.19917  | 1.7261   |
| H | -3.08584 | -0.62615 | 3.21287  |
| H | -1.63613 | -1.28185 | 2.48881  |
| H | -5.00735 | -3.09951 | 0.75628  |
| H | -6.4152  | -2.37519 | 1.5206   |
| H | -5.12752 | -0.95548 | -2.3046  |
| H | -5.62252 | -2.28811 | -1.30287 |
| H | -3.37565 | 2.25122  | -0.43268 |
| H | -3.08495 | 0.71826  | -1.2948  |
| H | -2.80099 | -3.02119 | 3.83776  |
| H | -2.81499 | -3.479   | 2.1358   |
| H | -5.07746 | -3.83082 | 3.1113   |
| H | -5.12231 | -2.15873 | 3.66204  |
| H | -0.77708 | -1.95043 | 0.79288  |
| H | -6.72885 | 1.50167  | -1.41551 |
| H | -5.32023 | 1.20004  | -2.48351 |
| H | -5.37034 | 2.6737   | -1.47293 |
| H | -3.52744 | -2.66422 | -3.24159 |
| H | -1.16168 | -3.43517 | -3.20235 |
| H | 2.26474  | -3.46322 | -0.3985  |
| H | 0.87339  | -3.67649 | 0.70718  |
| H | 1.41045  | -2.04162 | 0.21578  |
| H | -5.33329 | 1.50433  | 0.46394  |
| O | -5.68246 | 2.47768  | 1.50449  |
| H | -6.4707  | 2.98034  | 1.23499  |
| H | -4.91269 | 3.14103  | 1.6261   |
| O | -8.62335 | 3.37119  | 0.12094  |
| H | -8.31369 | 3.61238  | -0.75985 |

|   |           |          |          |
|---|-----------|----------|----------|
| H | -8.82928  | 2.41302  | 0.05023  |
| O | -9.00671  | 0.64574  | 0.27122  |
| H | -8.77303  | 0.58547  | 1.20588  |
| H | -8.79382  | -0.27826 | -0.03526 |
| H | -10.44555 | -4.16059 | 1.18582  |
| H | -1.58126  | 5.70495  | 2.14546  |
| H | -1.84803  | 3.8208   | -3.49462 |
| H | 5.36567   | -3.92282 | -3.37715 |
| H | 4.4568    | -1.73883 | -4.72822 |
| H | 2.66051   | 3.02019  | -3.37194 |
| H | 2.64639   | 4.54457  | -1.13179 |
| H | 5.86079   | 1.75642  | 5.06867  |
| H | 6.05686   | -4.93209 | 1.75144  |
| H | 6.13411   | -3.46683 | 4.02885  |
| H | 4.96954   | 3.95581  | 3.74119  |
| H | 7.43916   | 0.53338  | -2.49477 |

The cartesian coordinates of the transition state in quartet spin state of **Sig system**

**<sup>4</sup>TS<sub>Sig</sub>**

|   |          |         |          |
|---|----------|---------|----------|
| C | -2.28736 | 3.68571 | -2.46003 |
| C | -1.30136 | 2.56586 | -2.23726 |
| C | -0.50258 | 2.52954 | -1.08596 |
| C | -1.1547  | 1.52892 | -3.17111 |
| C | 0.41602  | 1.49895 | -0.87703 |
| C | -0.23792 | 0.49714 | -2.9679  |
| C | 0.55678  | 0.48252 | -1.82091 |
| H | -2.64073 | 4.12617 | -1.52378 |
| H | -3.16023 | 3.32933 | -3.01927 |
| H | -0.62211 | 3.31266 | -0.34205 |



|   |           |          |          |
|---|-----------|----------|----------|
| H | -1.77816  | 1.53055  | -4.06301 |
| H | 1.02876   | 1.47019  | 0.01787  |
| H | -0.1547   | -0.30637 | -3.69463 |
| H | 1.27656   | -0.3079  | -1.65124 |
| C | -9.80428  | -3.62485 | -0.06806 |
| C | -8.36147  | -3.04249 | -0.10677 |
| O | -7.40545  | -3.83732 | -0.01005 |
| O | -8.25994  | -1.77537 | -0.24289 |
| H | -10.34492 | -3.33935 | -0.97765 |
| H | -10.35149 | -3.19688 | 0.77933  |
| C | -2.18657  | 5.43578  | 1.67744  |
| C | -3.36664  | 4.49739  | 1.26834  |
| O | -3.87859  | 3.7579   | 2.16472  |
| O | -3.7167   | 4.52142  | 0.0619   |
| H | -2.24793  | 6.37322  | 1.11921  |
| H | -1.23951  | 4.94861  | 1.41486  |
| C | 7.917     | 0.59282  | -1.44735 |
| S | 7.01694   | 1.06624  | 0.06016  |
| H | 7.9437    | -0.49352 | -1.56208 |
| H | 8.9276    | 1.00756  | -1.43308 |
| N | 4.69817   | -0.85802 | -1.68565 |
| N | 5.16398   | -1.81022 | 0.93986  |
| N | 3.95593   | 1.74987  | -0.55986 |
| C | 3.86196   | 1.08456  | -2.93052 |
| C | 5.43769   | -3.11428 | -1.13556 |
| C | 5.30674   | -1.15253 | 3.30125  |
| C | 3.80626   | 3.08339  | 1.49815  |
| C | 4.39579   | -0.20571 | -2.85127 |
| C | 5.4123    | -2.97015 | 0.24942  |
| C | 5.02942   | 0.21567  | 3.1922   |

|    |          |          |          |
|----|----------|----------|----------|
| C  | 3.56173  | 2.87317  | 0.13992  |
| O  | 2.79477  | -0.42159 | 0.44741  |
| C  | 4.67501  | -1.07395 | -3.98437 |
| C  | 5.70048  | -4.04442 | 1.16915  |
| C  | 5.07226  | 1.17136  | 4.28999  |
| C  | 2.90819  | 3.81664  | -0.76954 |
| C  | 5.14072  | -2.26771 | -3.49895 |
| C  | 5.64691  | -3.52136 | 2.42395  |
| C  | 4.67605  | 2.38968  | 3.81097  |
| C  | 2.9685   | 3.25189  | -2.0081  |
| C  | 5.1275   | -2.11955 | -2.04865 |
| C  | 5.33425  | -2.10114 | 2.27328  |
| C  | 4.36659  | 2.16133  | 2.38864  |
| C  | 3.61837  | 1.96162  | -1.8758  |
| N  | 4.63185  | 0.85453  | 2.04936  |
| Fe | 4.46864  | -0.05615 | 0.20805  |
| H  | 3.58233  | 1.43404  | -3.91924 |
| H  | 5.7083   | -4.09023 | -1.52563 |
| H  | 5.53596  | -1.51689 | 4.29838  |
| H  | 3.52646  | 4.05197  | 1.90085  |
| O  | 0.99748  | -2.86072 | -1.02782 |
| N  | -5.09443 | 0.49876  | -0.40033 |
| C  | -2.9824  | -0.76346 | 1.184    |
| C  | -4.48125 | -1.13261 | 1.34043  |
| C  | -5.19729 | -0.96012 | 0.00161  |
| C  | -2.90016 | 0.71793  | 0.74482  |
| C  | -2.30686 | -0.91627 | 2.56199  |
| C  | -4.67622 | -2.54425 | 1.91528  |
| C  | -2.33493 | -1.62542 | 0.09244  |
| C  | -4.62036 | -1.91857 | -1.03727 |

|   |          |          |          |
|---|----------|----------|----------|
| C | -3.68968 | 1.0144   | -0.52494 |
| C | -2.49017 | -2.31431 | 3.16347  |
| C | -3.97903 | -2.67351 | 3.27372  |
| C | -3.1168  | -2.11036 | -0.97446 |
| C | -0.94794 | -1.85528 | 0.08771  |
| C | -5.92409 | 0.84261  | -1.58152 |
| C | -2.48539 | -2.81027 | -2.01261 |
| C | -0.35064 | -2.57503 | -0.94491 |
| C | -1.11889 | -3.04866 | -2.01097 |
| C | 1.83256  | -2.73289 | 0.06403  |
| H | -4.91767 | -0.41498 | 2.04898  |
| H | -6.27105 | -1.16477 | 0.09317  |
| H | -1.86099 | 0.99628  | 0.55719  |
| H | -3.26435 | 1.36617  | 1.54958  |
| H | -2.76557 | -0.17599 | 3.22974  |
| H | -1.24613 | -0.64771 | 2.50634  |
| H | -4.24967 | -3.28525 | 1.23044  |
| H | -5.74353 | -2.77638 | 1.97656  |
| H | -4.91229 | -1.62032 | -2.04997 |
| H | -5.14249 | -2.86996 | -0.86594 |
| H | -3.76594 | 2.09604  | -0.66272 |
| H | -3.2333  | 0.5625   | -1.40757 |
| H | -2.00942 | -2.36123 | 4.14841  |
| H | -1.98471 | -3.05342 | 2.52845  |
| H | -4.09832 | -3.69139 | 3.66381  |
| H | -4.45898 | -1.99945 | 3.99725  |
| H | -0.32867 | -1.4324  | 0.86806  |
| H | -6.94708 | 0.50524  | -1.40056 |
| H | -5.51529 | 0.37951  | -2.48062 |
| H | -5.90216 | 1.92897  | -1.69057 |

|   |          |          |          |
|---|----------|----------|----------|
| H | -3.0896  | -3.1803  | -2.83738 |
| H | -0.63188 | -3.59661 | -2.81052 |
| H | 2.72358  | -3.33644 | -0.10641 |
| H | 1.34537  | -2.91486 | 1.02599  |
| H | 2.36055  | -1.50946 | 0.19227  |
| H | -5.51441 | 1.1054   | 0.38608  |
| O | -5.95916 | 2.21828  | 1.32136  |
| H | -6.74139 | 2.73562  | 1.07044  |
| H | -5.22396 | 2.86005  | 1.58903  |
| O | -8.83835 | 3.3287   | -0.03405 |
| H | -8.29231 | 3.45934  | -0.81878 |
| H | -8.98647 | 2.35714  | -0.0244  |
| O | -9.19185 | 0.61831  | -0.38592 |
| H | -9.7531  | 0.51449  | -1.16248 |
| H | -8.89946 | -0.32368 | -0.19073 |
| H | -9.78063 | -4.71262 | 0.02103  |
| H | -2.18814 | 5.6265   | 2.75353  |
| H | -1.83178 | 4.48277  | -3.06521 |
| H | 5.43892  | -3.1567  | -4.03616 |
| H | 4.52103  | -0.78894 | -5.01737 |
| H | 2.56992  | 3.63897  | -2.93599 |
| H | 2.47864  | 4.76402  | -0.47618 |
| H | 5.36846  | 0.92028  | 5.30062  |
| H | 5.92035  | -5.06213 | 0.8749   |
| H | 5.81979  | -4.01558 | 3.37069  |
| H | 4.56735  | 3.32998  | 4.33206  |
| H | 7.38041  | 1.00853  | -2.30874 |

The cartesian coordinates of the intermediate state in quartet spin state of **Sig system**

**<sup>4</sup>IM<sub>Sig</sub>**

|   |           |          |          |
|---|-----------|----------|----------|
| C | -2.24881  | 3.60089  | -2.56036 |
| C | -1.28513  | 2.47143  | -2.28743 |
| C | -0.42518  | 2.50926  | -1.18078 |
| C | -1.22491  | 1.34787  | -3.1258  |
| C | 0.46631   | 1.4659   | -0.92188 |
| C | -0.33696  | 0.30177  | -2.87263 |
| C | 0.51724   | 0.36059  | -1.77068 |
| H | -2.61547  | 4.07107  | -1.64319 |
| H | -3.11358  | 3.24477  | -3.13135 |
| H | -0.47377  | 3.36121  | -0.50758 |
| H | -1.89628  | 1.29136  | -3.98026 |
| H | 1.12399   | 1.49191  | -0.05981 |
| H | -0.32629  | -0.56992 | -3.52089 |
| H | 1.2132    | -0.44189 | -1.55997 |
| C | -9.78057  | -3.54445 | 0.24796  |
| C | -8.3485   | -2.96827 | 0.08856  |
| O | -7.3825   | -3.73895 | 0.25189  |
| O | -8.27017  | -1.72868 | -0.21972 |
| H | -10.34199 | -3.40352 | -0.68276 |
| H | -10.31601 | -2.99598 | 1.03116  |
| C | -2.10142  | 5.5477   | 1.48683  |
| C | -3.29215  | 4.61164  | 1.11488  |
| O | -3.76759  | 3.86333  | 2.02388  |
| O | -3.69108  | 4.64401  | -0.07638 |
| H | -2.18001  | 6.4871   | 0.93414  |
| H | -1.16359  | 5.06059  | 1.19333  |
| C | 7.94855   | 0.50427  | -1.4902  |
| S | 7.13674   | 1.01249  | 0.0538   |
| H | 7.93429   | -0.58326 | -1.59712 |

|    |         |          |          |
|----|---------|----------|----------|
| H  | 8.97167 | 0.8853   | -1.52821 |
| N  | 4.73132 | -0.93706 | -1.63329 |
| N  | 5.22258 | -1.76732 | 1.0308   |
| N  | 4.02811 | 1.73869  | -0.62919 |
| C  | 3.89689 | 0.95151  | -2.96107 |
| C  | 5.44484 | -3.17599 | -0.9794  |
| C  | 5.39167 | -0.99104 | 3.35478  |
| C  | 3.88509 | 3.16037  | 1.36786  |
| C  | 4.42323 | -0.33781 | -2.82568 |
| C  | 5.43808 | -2.9655  | 0.39794  |
| C  | 5.11728 | 0.37226  | 3.18485  |
| C  | 3.63323 | 2.88952  | 0.02101  |
| O  | 2.84627 | -0.40519 | 0.502    |
| C  | 4.6821  | -1.26307 | -3.91697 |
| C  | 5.71922 | -3.99552 | 1.36883  |
| C  | 5.16502 | 1.37688  | 4.23798  |
| C  | 2.96253 | 3.78453  | -0.92428 |
| C  | 5.13921 | -2.43646 | -3.37675 |
| C  | 5.69303 | -3.40604 | 2.59501  |
| C  | 4.76484 | 2.57023  | 3.70386  |
| C  | 3.01033 | 3.16105  | -2.13501 |
| C  | 5.14282 | -2.22    | -1.93687 |
| C  | 5.40184 | -1.99067 | 2.3754   |
| C  | 4.45003 | 2.27923  | 2.29614  |
| C  | 3.66898 | 1.88172  | -1.94829 |
| N  | 4.7144  | 0.95951  | 2.01743  |
| Fe | 4.55829 | -0.03274 | 0.21968  |
| H  | 3.60627 | 1.25267  | -3.96255 |
| H  | 5.69584 | -4.17356 | -1.32557 |
| H  | 5.62668 | -1.30851 | 4.36655  |

|   |          |          |          |
|---|----------|----------|----------|
| H | 3.60445  | 4.14491  | 1.72929  |
| O | 0.72342  | -3.12243 | -1.20218 |
| N | -5.14682 | 0.55259  | -0.39747 |
| C | -3.00602 | -0.73498 | 1.12814  |
| C | -4.50781 | -1.0163  | 1.39306  |
| C | -5.29269 | -0.8772  | 0.08941  |
| C | -2.87985 | 0.7186   | 0.61344  |
| C | -2.24909 | -0.85607 | 2.46637  |
| C | -4.73504 | -2.38367 | 2.05667  |
| C | -2.47454 | -1.6825  | 0.04464  |
| C | -4.83472 | -1.91671 | -0.92742 |
| C | -3.73076 | 0.99394  | -0.61971 |
| C | -2.46204 | -2.21099 | 3.15039  |
| C | -3.95681 | -2.48149 | 3.37304  |
| C | -3.34356 | -2.18052 | -0.94683 |
| C | -1.1052  | -1.98533 | -0.0316  |
| C | -6.01152 | 0.8696   | -1.56103 |
| C | -2.81495 | -2.96478 | -1.98187 |
| C | -0.61417 | -2.78541 | -1.05935 |
| C | -1.46365 | -3.27486 | -2.05065 |
| C | 1.56317  | -3.09427 | -0.13661 |
| H | -4.86423 | -0.24043 | 2.08483  |
| H | -6.36665 | -1.02406 | 0.24495  |
| H | -1.84227 | 0.93727  | 0.35367  |
| H | -3.16679 | 1.41821  | 1.40681  |
| H | -2.62592 | -0.06143 | 3.12283  |
| H | -1.18262 | -0.64612 | 2.3295   |
| H | -4.39885 | -3.18233 | 1.38725  |
| H | -5.80568 | -2.55367 | 2.20109  |
| H | -5.18068 | -1.65842 | -1.9338  |

|   |          |          |          |
|---|----------|----------|----------|
| H | -5.39414 | -2.82758 | -0.66836 |
| H | -3.76767 | 2.0693   | -0.80854 |
| H | -3.34672 | 0.48119  | -1.50324 |
| H | -1.92008 | -2.23549 | 4.10382  |
| H | -2.0385  | -3.007   | 2.52421  |
| H | -4.1031  | -3.47014 | 3.82437  |
| H | -4.35196 | -1.74595 | 4.08807  |
| H | -0.41238 | -1.55665 | 0.68085  |
| H | -7.03576 | 0.56849  | -1.33181 |
| H | -5.64709 | 0.35802  | -2.45286 |
| H | -5.96389 | 1.94954  | -1.71832 |
| H | -3.48905 | -3.34522 | -2.74527 |
| H | -1.05531 | -3.88902 | -2.84613 |
| H | 2.53811  | -3.50624 | -0.37133 |
| H | 1.13201  | -3.21731 | 0.85307  |
| H | 2.62172  | -1.30875 | 0.19931  |
| H | -5.50548 | 1.21004  | 0.37908  |
| O | -5.89336 | 2.33759  | 1.31981  |
| H | -6.6681  | 2.86247  | 1.06102  |
| H | -5.1362  | 2.97373  | 1.53481  |
| O | -8.77913 | 3.39725  | -0.06201 |
| H | -8.24653 | 3.48658  | -0.86156 |
| H | -8.92115 | 2.42732  | 0.00483  |
| O | -9.14956 | 0.67503  | -0.2796  |
| H | -9.74964 | 0.58362  | -1.02857 |
| H | -8.86822 | -0.27607 | -0.10343 |
| H | -9.74723 | -4.6063  | 0.49975  |
| H | -2.07002 | 5.73404  | 2.56314  |
| H | -1.76713 | 4.3791   | -3.16948 |
| H | 5.42131  | -3.35384 | -3.87361 |



|   |         |          |          |
|---|---------|----------|----------|
| H | 4.52078 | -1.02868 | -4.96145 |
| H | 2.5971  | 3.50087  | -3.07495 |
| H | 2.53031 | 4.7424   | -0.67155 |
| H | 5.46489 | 1.17373  | 5.2582   |
| H | 5.91591 | -5.03144 | 1.12631  |
| H | 5.86852 | -3.8542  | 3.56395  |
| H | 4.65719 | 3.53288  | 4.18294  |
| H | 7.38402 | 0.92914  | -2.329   |

The cartesian coordinates of the product complex in quartet spin state of **Sig system**

**<sup>4</sup>PC<sub>Sig</sub>**

|   |          |          |          |
|---|----------|----------|----------|
| C | -2.28495 | 3.79955  | -2.35004 |
| C | -1.3299  | 2.64962  | -2.17067 |
| C | -0.50174 | 2.58277  | -1.04327 |
| C | -1.22824 | 1.62317  | -3.12198 |
| C | 0.41804  | 1.5448   | -0.89003 |
| C | -0.32034 | 0.57683  | -2.96437 |
| C | 0.52174  | 0.53984  | -1.85198 |
| H | -2.6466  | 4.19215  | -1.39487 |
| H | -3.15214 | 3.49582  | -2.94748 |
| H | -0.58536 | 3.35585  | -0.28496 |
| H | -1.87816 | 1.6477   | -3.99395 |
| H | 1.07739  | 1.54981  | -0.02599 |
| H | -0.27028 | -0.21684 | -3.70411 |
| H | 1.24202  | -0.26058 | -1.73654 |
| C | -9.79777 | -3.65493 | -0.43751 |
| C | -8.36054 | -3.05338 | -0.38564 |
| O | -7.40793 | -3.82549 | -0.16497 |
| O | -8.26562 | -1.79341 | -0.59447 |

|   |           |          |          |
|---|-----------|----------|----------|
| H | -10.24828 | -3.45421 | -1.41631 |
| H | -10.43078 | -3.16883 | 0.31345  |
| C | -2.22032  | 5.31033  | 1.88129  |
| C | -3.38925  | 4.3765   | 1.41743  |
| O | -3.94603  | 3.64242  | 2.29216  |
| O | -3.6781   | 4.40297  | 0.19606  |
| H | -2.25977  | 6.25247  | 1.32896  |
| H | -1.26499  | 4.82362  | 1.64782  |
| C | 7.92068   | 0.67973  | -1.43811 |
| S | 7.07077   | 0.88308  | 0.17927  |
| H | 7.89292   | -0.36349 | -1.76262 |
| H | 8.96191   | 0.98922  | -1.31905 |
| N | 4.78732   | -0.73103 | -1.78281 |
| N | 5.2187    | -1.83343 | 0.7907   |
| N | 3.89469   | 1.73652  | -0.50657 |
| C | 3.85156   | 1.23355  | -2.92092 |
| C | 5.53115   | -3.01496 | -1.35678 |
| C | 5.28528   | -1.34306 | 3.19346  |
| C | 3.79973   | 2.98995  | 1.60943  |
| C | 4.4255    | -0.0381  | -2.91282 |
| C | 5.48328   | -2.95009 | 0.03048  |
| C | 5.01659   | 0.0295   | 3.15044  |
| C | 3.53296   | 2.84124  | 0.24653  |
| O | 2.25117   | -0.95116 | 0.49652  |
| C | 4.67011   | -0.85656 | -4.08634 |
| C | 5.72983   | -4.08584 | 0.88709  |
| C | 5.02057   | 0.91611  | 4.30092  |
| C | 2.89738   | 3.84678  | -0.61533 |
| C | 5.16833   | -2.0658  | -3.67104 |
| C | 5.63395   | -3.65488 | 2.17418  |

|    |          |          |          |
|----|----------|----------|----------|
| C  | 4.63518  | 2.16466  | 3.88945  |
| C  | 2.94889  | 3.33637  | -1.87893 |
| C  | 5.21111  | -1.97444 | -2.21531 |
| C  | 5.34403  | -2.21984 | 2.10904  |
| C  | 4.36389  | 2.02382  | 2.448    |
| C  | 3.58122  | 2.03315  | -1.81198 |
| N  | 4.64603  | 0.7355   | 2.03233  |
| Fe | 4.80424  | 0.03701  | 0.1186   |
| H  | 3.56273  | 1.63409  | -3.88691 |
| H  | 5.80083  | -3.96857 | -1.79823 |
| H  | 5.48012  | -1.76638 | 4.17392  |
| H  | 3.53176  | 3.94044  | 2.05975  |
| O  | 1.11965  | -2.66947 | -0.65965 |
| N  | -5.10684 | 0.47146  | -0.47302 |
| C  | -3.09421 | -0.75584 | 1.24838  |
| C  | -4.59178 | -1.15909 | 1.28972  |
| C  | -5.20641 | -0.99486 | -0.09882 |
| C  | -2.99481 | 0.72452  | 0.80731  |
| C  | -2.52919 | -0.89495 | 2.67692  |
| C  | -4.79446 | -2.57891 | 1.8407   |
| C  | -2.34971 | -1.59797 | 0.20849  |
| C  | -4.52796 | -1.92924 | -1.10004 |
| C  | -3.70669 | 1.01082  | -0.51126 |
| C  | -2.72323 | -2.29896 | 3.26141  |
| C  | -4.20634 | -2.69732 | 3.25045  |
| C  | -3.02949 | -2.09196 | -0.91865 |
| C  | -0.96009 | -1.78068 | 0.30899  |
| C  | -5.88432 | 0.82062  | -1.68655 |
| C  | -2.29152 | -2.76769 | -1.90154 |
| C  | -0.2469  | -2.45933 | -0.67685 |

|   |          |          |          |
|---|----------|----------|----------|
| C | -0.92035 | -2.95845 | -1.79442 |
| C | 1.86098  | -2.30459 | 0.48298  |
| H | -5.09817 | -0.45602 | 1.96485  |
| H | -6.27947 | -1.22444 | -0.09274 |
| H | -1.94621 | 1.00691  | 0.67889  |
| H | -3.40339 | 1.37719  | 1.58552  |
| H | -3.05984 | -0.16749 | 3.30375  |
| H | -1.47458 | -0.59682 | 2.71195  |
| H | -4.29199 | -3.3032  | 1.18998  |
| H | -5.85608 | -2.84094 | 1.81041  |
| H | -4.74424 | -1.62184 | -2.12912 |
| H | -5.04246 | -2.89196 | -0.97972 |
| H | -3.78947 | 2.09297  | -0.64319 |
| H | -3.19001 | 0.56955  | -1.3653  |
| H | -2.32254 | -2.3355  | 4.28207  |
| H | -2.1491  | -3.02316 | 2.66879  |
| H | -4.32889 | -3.71984 | 3.62694  |
| H | -4.76027 | -2.03972 | 3.93507  |
| H | -0.4475  | -1.3659  | 1.16809  |
| H | -6.91071 | 0.47184  | -1.55417 |
| H | -5.43294 | 0.36652  | -2.57004 |
| H | -5.86616 | 1.90786  | -1.78785 |
| H | -2.81344 | -3.15333 | -2.7742  |
| H | -0.35528 | -3.48096 | -2.55896 |
| H | 2.78819  | -2.8725  | 0.43452  |
| H | 1.29989  | -2.56451 | 1.39007  |
| H | 1.47017  | -0.38382 | 0.55718  |
| H | -5.56074 | 1.05551  | 0.31233  |
| O | -5.98055 | 2.10891  | 1.31301  |
| H | -6.77366 | 2.62852  | 1.10318  |

|   |          |          |          |
|---|----------|----------|----------|
| H | -5.25836 | 2.74647  | 1.62883  |
| O | -8.85282 | 3.28771  | 0.00141  |
| H | -8.28671 | 3.46427  | -0.75983 |
| H | -8.9954  | 2.31613  | -0.04825 |
| O | -9.19565 | 0.60101  | -0.50754 |
| H | -9.76926 | 0.55322  | -1.28057 |
| H | -8.89184 | -0.35236 | -0.39694 |
| H | -9.77286 | -4.73142 | -0.25738 |
| H | -2.25808 | 5.4932   | 2.95812  |
| H | -1.79458 | 4.6158   | -2.8999  |
| H | 5.44688  | -2.93183 | -4.2538  |
| H | 4.4639   | -0.53392 | -5.09891 |
| H | 2.56495  | 3.7756   | -2.7897  |
| H | 2.48849  | 4.78713  | -0.27459 |
| H | 5.28412  | 0.60176  | 5.30281  |
| H | 5.94502  | -5.08384 | 0.5288   |
| H | 5.76327  | -4.21487 | 3.09032  |
| H | 4.50328  | 3.06889  | 4.4657   |
| H | 7.44901  | 1.30076  | -2.20399 |

The cartesian coordinates of the reactant complex in doublet spin state of **Dbl system**

**<sup>2</sup>RC<sub>Dbl</sub>**

|   |         |          |         |
|---|---------|----------|---------|
| C | 2.36984 | -1.55464 | 4.13056 |
| H | 3.17942 | -0.91374 | 4.49445 |
| H | 2.81404 | -2.45117 | 3.68644 |
| C | 1.48387 | -0.83055 | 3.14244 |
| C | 1.34377 | 0.56487  | 3.17451 |
| H | 1.8948  | 1.13845  | 3.91685 |
| C | 0.49682 | 1.22162  | 2.27793 |

|   |          |          |          |
|---|----------|----------|----------|
| H | 0.39416  | 2.30222  | 2.32646  |
| C | -0.23434 | 0.4954   | 1.3354   |
| H | -0.92489 | 0.98424  | 0.65612  |
| C | -0.10845 | -0.89312 | 1.30502  |
| H | -0.69764 | -1.47484 | 0.60903  |
| C | 0.752    | -1.54628 | 2.18719  |
| H | 0.85296  | -2.62693 | 2.13295  |
| C | 11.74399 | 0.44811  | 0.29781  |
| H | 12.03127 | 0.0348   | 1.26735  |
| H | 12.29247 | 1.37613  | 0.12285  |
| C | 10.22733 | 0.62404  | 0.27313  |
| O | 9.45454  | -0.29676 | 0.54042  |
| N | 9.77477  | 1.86488  | -0.05765 |
| H | 8.77477  | 2.01681  | -0.12979 |
| H | 10.40324 | 2.59941  | -0.33967 |
| C | 4.57089  | 4.25438  | -1.37438 |
| H | 5.10557  | 3.49423  | -1.94565 |
| H | 5.02178  | 5.23232  | -1.57544 |
| O | 4.6928   | 3.89152  | 0.00684  |
| H | 4.24074  | 4.54605  | 0.55343  |
| C | -7.61947 | -1.08952 | 1.58378  |
| H | -8.39463 | -0.82066 | 2.3065   |
| H | -8.08866 | -1.657   | 0.7739   |
| S | -6.94115 | 0.46115  | 0.8896   |
| N | -4.41633 | 2.46342  | 0.25138  |
| C | -4.83645 | 3.44617  | -0.62631 |
| C | -3.91882 | 3.10477  | 1.35535  |
| C | -4.61927 | 4.79637  | -0.01568 |
| C | -4.05424 | 4.54335  | 1.19922  |
| C | -3.32555 | 2.48817  | 2.45664  |

|    |          |          |          |
|----|----------|----------|----------|
| H  | -2.94975 | 3.14847  | 3.23202  |
| C  | -3.13659 | 1.12257  | 2.66875  |
| N  | -3.58293 | 0.11257  | 1.85297  |
| C  | -3.18746 | -1.07201 | 2.44253  |
| C  | -2.43234 | -0.80061 | 3.65837  |
| C  | -2.42781 | 0.55724  | 3.80045  |
| C  | -3.51673 | -2.34832 | 1.98888  |
| H  | -3.18599 | -3.18509 | 2.59558  |
| C  | -4.23325 | -2.63856 | 0.83358  |
| C  | -4.61577 | -3.98411 | 0.36754  |
| C  | -5.21887 | -2.31418 | -1.12095 |
| N  | -4.63934 | -1.66148 | -0.06453 |
| C  | -5.21735 | -3.75333 | -0.84924 |
| C  | -5.69607 | -1.69081 | -2.28919 |
| H  | -6.07675 | -2.35933 | -3.05575 |
| C  | -5.73903 | -0.32365 | -2.60551 |
| C  | -6.2015  | 0.23217  | -3.87576 |
| N  | -5.36935 | 0.70647  | -1.77318 |
| C  | -5.58394 | 1.89241  | -2.46463 |
| C  | -5.35464 | 3.15995  | -1.90361 |
| H  | -5.60785 | 4.0141   | -2.52467 |
| Fe | -4.34771 | 0.39689  | 0.00304  |
| C  | -6.11239 | 1.59842  | -3.83322 |
| O  | -2.89736 | 0.38355  | -0.71756 |
| O  | -0.36475 | -3.14909 | -1.34564 |
| N  | 5.62321  | -0.25379 | 0.79701  |
| C  | 3.51869  | -0.03101 | -1.24407 |
| C  | 5.02692  | -0.10961 | -1.5953  |
| C  | 5.75526  | -0.95907 | -0.55103 |
| C  | 3.38342  | 0.62462  | 0.15364  |

|   |          |          |          |
|---|----------|----------|----------|
| C | 2.83198  | 0.86861  | -2.29087 |
| C | 5.26495  | -0.61968 | -3.02462 |
| C | 2.91721  | -1.43688 | -1.16078 |
| C | 5.21052  | -2.38869 | -0.5283  |
| C | 4.18621  | -0.09769 | 1.22651  |
| C | 3.04651  | 0.37605  | -3.72561 |
| C | 4.54271  | 0.26695  | -4.04645 |
| C | 3.70966  | -2.51088 | -0.7265  |
| C | 1.54802  | -1.6372  | -1.39263 |
| C | 6.4857   | -0.8498  | 1.85994  |
| C | 3.10112  | -3.7576  | -0.51269 |
| C | 0.95626  | -2.88409 | -1.18002 |
| C | 1.74612  | -3.9522  | -0.72754 |
| C | -1.19446 | -2.18208 | -1.99774 |
| H | 5.43304  | 0.91167  | -1.53876 |
| H | 6.83343  | -0.96648 | -0.73688 |
| H | 2.33756  | 0.62723  | 0.46759  |
| H | 3.71219  | 1.66904  | 0.09838  |
| H | 3.25995  | 1.87382  | -2.19277 |
| H | 1.76755  | 0.97722  | -2.06321 |
| H | 4.88997  | -1.64456 | -3.11689 |
| H | 6.34131  | -0.65017 | -3.23171 |
| H | 5.52053  | -2.91135 | 0.38237  |
| H | 5.7246   | -2.9198  | -1.33892 |
| H | 4.18991  | 0.46163  | 2.16389  |
| H | 3.79082  | -1.09354 | 1.42547  |
| H | 2.55604  | 1.05612  | -4.42997 |
| H | 2.57272  | -0.60445 | -3.84969 |
| H | 4.69103  | -0.13092 | -5.05537 |
| H | 4.99139  | 1.27069  | -4.0366  |



|   |          |          |          |
|---|----------|----------|----------|
| H | 0.92889  | -0.80796 | -1.70312 |
| H | 6.38845  | -0.23426 | 2.75601  |
| H | 7.52089  | -0.84161 | 1.5104   |
| H | 6.15026  | -1.86084 | 2.08562  |
| H | 3.70939  | -4.59345 | -0.17552 |
| H | 1.27703  | -4.91562 | -0.56141 |
| H | -0.79084 | -1.92849 | -2.98527 |
| H | -1.3241  | -1.27186 | -1.4049  |
| H | -2.1693  | -2.65691 | -2.10798 |
| H | 6.00484  | 0.70799  | 0.6556   |
| O | 6.74233  | 2.30551  | 0.63297  |
| H | 7.17162  | 2.55668  | 1.46079  |
| H | 6.05375  | 2.98984  | 0.45175  |
| H | 12.02369 | -0.28322 | -0.46535 |
| H | 1.79951  | -1.88042 | 5.00835  |
| H | 3.5227   | 4.26059  | -1.68924 |
| H | -6.84012 | -1.6915  | 2.05251  |
| H | -4.87391 | 5.73766  | -0.48049 |
| H | -3.74791 | 5.26131  | 1.9492   |
| H | -1.96995 | 1.14461  | 4.58464  |
| H | -1.99952 | -1.55448 | 4.29964  |
| H | -4.42952 | -4.91312 | 0.88474  |
| H | -5.63504 | -4.48802 | -1.52642 |
| H | -6.55262 | -0.37625 | -4.69979 |
| H | -6.37096 | 2.33446  | -4.57968 |

The cartesian coordinates of the transition state in doublet spin state of **Dbl system**

**<sup>2</sup>TS<sub>Dbl</sub>**

|   |          |          |          |
|---|----------|----------|----------|
| C | -2.54142 | -2.18532 | -3.72639 |
|---|----------|----------|----------|

|   |           |          |          |
|---|-----------|----------|----------|
| H | -2.63855  | -2.97629 | -2.9761  |
| H | -2.01629  | -2.61674 | -4.58643 |
| C | -1.79195  | -0.99231 | -3.1708  |
| C | -1.99352  | 0.29132  | -3.7007  |
| H | -2.70285  | 0.42699  | -4.51415 |
| C | -1.28742  | 1.38997  | -3.20683 |
| H | -1.45418  | 2.37389  | -3.63666 |
| C | -0.36116  | 1.22334  | -2.17409 |
| H | 0.21193   | 2.06613  | -1.80181 |
| C | -0.1502   | -0.04704 | -1.63847 |
| H | 0.59484   | -0.17923 | -0.86124 |
| C | -0.86714  | -1.14062 | -2.12912 |
| H | -0.70076  | -2.12335 | -1.6994  |
| C | -11.86955 | 0.07162  | 0.07668  |
| H | -12.43517 | 1.0008   | 0.1748   |
| H | -12.08633 | -0.5698  | 0.93571  |
| C | -10.3602  | 0.28577  | -0.00588 |
| O | -9.58129  | -0.62694 | -0.27856 |
| N | -9.92317  | 1.55194  | 0.2426   |
| H | -8.92559  | 1.73335  | 0.24592  |
| H | -10.55542 | 2.28561  | 0.51805  |
| C | -4.74261  | 4.17303  | 1.1334   |
| H | -5.14247  | 3.37895  | 1.7655   |
| H | -5.24947  | 5.11182  | 1.38238  |
| O | -4.99098  | 3.7839   | -0.2231  |
| H | -4.65872  | 4.46558  | -0.82015 |
| C | 7.48894   | -1.25171 | -1.48845 |
| H | 8.2728    | -1.05564 | -2.22461 |
| H | 7.94679   | -1.72989 | -0.61676 |
| S | 6.79302   | 0.36231  | -0.96943 |

|    |         |          |          |
|----|---------|----------|----------|
| N  | 4.20829 | 2.37756  | -0.48143 |
| C  | 4.6359  | 3.45484  | 0.26461  |
| C  | 3.71066 | 2.87764  | -1.65326 |
| C  | 4.40281 | 4.7229   | -0.49718 |
| C  | 3.83343 | 4.32807  | -1.67053 |
| C  | 3.14088 | 2.12     | -2.67712 |
| H  | 2.75861 | 2.67389  | -3.52918 |
| C  | 2.97542 | 0.73342  | -2.72797 |
| N  | 3.43421 | -0.17146 | -1.80197 |
| C  | 3.0263  | -1.41894 | -2.23212 |
| C  | 2.25317 | -1.29547 | -3.45791 |
| C  | 2.2573  | 0.03411  | -3.77361 |
| C  | 3.37349 | -2.62885 | -1.63124 |
| H  | 3.0395  | -3.53589 | -2.12491 |
| C  | 4.13004 | -2.7716  | -0.47297 |
| C  | 4.57294 | -4.04255 | 0.12037  |
| C  | 5.18468 | -2.20689 | 1.38881  |
| N  | 4.53204 | -1.69164 | 0.29835  |
| C  | 5.22008 | -3.6662  | 1.27566  |
| C  | 5.68088 | -1.44399 | 2.46463  |
| H  | 6.1087  | -2.014   | 3.28437  |
| C  | 5.69471 | -0.04837 | 2.62917  |
| C  | 6.17411 | 0.65861  | 3.81579  |
| N  | 5.27321 | 0.87082  | 1.69816  |
| C  | 5.47188 | 2.13215  | 2.24519  |
| C  | 5.19272 | 3.32288  | 1.55236  |
| H  | 5.44535 | 4.24646  | 2.06527  |
| Fe | 4.22931 | 0.33283  | -0.02507 |
| C  | 6.04426 | 2.00906  | 3.62232  |
| O  | 2.67659 | 0.43403  | 0.74351  |

|   |          |          |          |
|---|----------|----------|----------|
| O | 0.97913  | -2.55432 | 1.18893  |
| N | -5.57462 | -0.47212 | -0.47503 |
| C | -3.23995 | 0.12071  | 1.22827  |
| C | -4.66455 | -0.11645 | 1.79401  |
| C | -5.41443 | -1.10814 | 0.90101  |
| C | -3.38807 | 0.68635  | -0.20793 |
| C | -2.54118 | 1.16699  | 2.11928  |
| C | -4.64075 | -0.55648 | 3.26518  |
| C | -2.47606 | -1.20467 | 1.14872  |
| C | -4.69137 | -2.45754 | 0.84578  |
| C | -4.23977 | -0.19093 | -1.11519 |
| C | -2.4991  | 0.75496  | 3.59502  |
| C | -3.91146 | 0.48112  | 4.12819  |
| C | -3.17361 | -2.38918 | 0.86176  |
| C | -1.07719 | -1.23866 | 1.26211  |
| C | -6.51413 | -1.21324 | -1.3701  |
| C | -2.44918 | -3.57146 | 0.64584  |
| C | -0.3758  | -2.43133 | 1.08068  |
| C | -1.0664  | -3.60324 | 0.7447   |
| C | 1.7327   | -1.61598 | 1.88885  |
| H | -5.19993 | 0.8443   | 1.7479   |
| H | -6.44014 | -1.24813 | 1.25458  |
| H | -2.4078  | 0.7915   | -0.67476 |
| H | -3.83393 | 1.68599  | -0.15943 |
| H | -3.10272 | 2.10387  | 2.03047  |
| H | -1.53905 | 1.38573  | 1.73876  |
| H | -4.12671 | -1.5197  | 3.35433  |
| H | -5.66622 | -0.70425 | 3.62419  |
| H | -5.03723 | -3.05348 | -0.00478 |
| H | -5.02555 | -3.01607 | 1.72858  |

|   |           |          |          |
|---|-----------|----------|----------|
| H | -4.43552  | 0.30281  | -2.06819 |
| H | -3.76406  | -1.14853 | -1.32086 |
| H | -2.01706  | 1.54098  | 4.18546  |
| H | -1.88532  | -0.14586 | 3.70809  |
| H | -3.86906  | 0.13776  | 5.16659  |
| H | -4.48769  | 1.41723  | 4.13136  |
| H | -0.5229   | -0.33096 | 1.45657  |
| H | -6.54689  | -0.6897  | -2.32688 |
| H | -7.50968  | -1.20644 | -0.9182  |
| H | -6.15364  | -2.22747 | -1.53284 |
| H | -2.98527  | -4.48865 | 0.41523  |
| H | -0.5057   | -4.51879 | 0.59377  |
| H | 1.18098   | -1.12335 | 2.69394  |
| H | 2.22239   | -0.57423 | 1.14553  |
| H | 2.65803   | -2.08955 | 2.20744  |
| H | -6.03536  | 0.45492  | -0.34232 |
| O | -6.91628  | 1.96891  | -0.58653 |
| H | -7.36318  | 2.04462  | -1.43911 |
| H | -6.29916  | 2.7359   | -0.51774 |
| H | -12.19594 | -0.45993 | -0.81963 |
| H | -3.54355  | -1.90799 | -4.06942 |
| H | -3.66982  | 4.27292  | 1.32542  |
| H | 6.71833   | -1.90347 | -1.90217 |
| H | 4.65601   | 5.7142   | -0.15002 |
| H | 3.52128   | 4.95193  | -2.49831 |
| H | 1.78218   | 0.52035  | -4.61471 |
| H | 1.80887   | -2.1195  | -3.99752 |
| H | 4.40059   | -5.02829 | -0.28496 |
| H | 5.69183   | -4.31222 | 2.00567  |
| H | 6.56344   | 0.15725  | 4.69315  |

|   |         |         |         |
|---|---------|---------|---------|
| H | 6.30011 | 2.83068 | 4.27459 |
|---|---------|---------|---------|

The cartesian coordinates of the intermediate state in doublet spin state of **Dbl system**

$^2\text{IM}_{\text{Dbl}}$

|   |           |          |          |
|---|-----------|----------|----------|
| C | -2.37772  | -1.77405 | -3.70036 |
| H | -2.57279  | -2.56746 | -2.97096 |
| H | -1.75359  | -2.20921 | -4.48939 |
| C | -1.69045  | -0.59156 | -3.05044 |
| C | -2.01518  | 0.72253  | -3.41574 |
| H | -2.76979  | 0.89119  | -4.18088 |
| C | -1.37071  | 1.81379  | -2.82638 |
| H | -1.62654  | 2.82265  | -3.13975 |
| C | -0.3873   | 1.60713  | -1.85624 |
| H | 0.13724   | 2.44616  | -1.40979 |
| C | -0.04953  | 0.30381  | -1.48651 |
| H | 0.73785   | 0.14279  | -0.75701 |
| C | -0.69568  | -0.78131 | -2.08071 |
| H | -0.40874  | -1.78832 | -1.79824 |
| C | -11.60658 | 0.64824  | 0.24068  |
| H | -12.14469 | 1.58834  | 0.37864  |
| H | -11.8789  | -0.04194 | 1.04393  |
| C | -10.08952 | 0.81281  | 0.23242  |
| O | -9.32686  | -0.12311 | -0.01837 |
| N | -9.61782  | 2.05652  | 0.51515  |
| H | -8.61474  | 2.19749  | 0.55942  |
| H | -10.23125 | 2.80828  | 0.78521  |
| C | -4.33313  | 4.44092  | 1.44167  |

|   |          |          |          |
|---|----------|----------|----------|
| H | -5.32863 | 4.4943   | 1.88484  |
| H | -3.8771  | 5.4352   | 1.4724   |
| O | -4.51258 | 4.00049  | 0.08805  |
| H | -3.65098 | 3.89322  | -0.33483 |
| C | 7.68665  | -1.2999  | -1.4706  |
| H | 8.57167  | -1.13737 | -2.08964 |
| H | 7.97475  | -1.90573 | -0.60453 |
| S | 7.0986   | 0.31954  | -0.85599 |
| N | 4.55061  | 2.40144  | -0.28423 |
| C | 5.03768  | 3.42853  | 0.49197  |
| C | 4.01199  | 2.96932  | -1.40693 |
| C | 4.82118  | 4.73272  | -0.20589 |
| C | 4.1844   | 4.41292  | -1.36682 |
| C | 3.36341  | 2.28322  | -2.43292 |
| H | 2.95536  | 2.89226  | -3.23386 |
| C | 3.16859  | 0.90503  | -2.55673 |
| N | 3.65239  | -0.06108 | -1.70854 |
| C | 3.24316  | -1.27621 | -2.21914 |
| C | 2.44666  | -1.06955 | -3.41572 |
| C | 2.42244  | 0.28034  | -3.62801 |
| C | 3.58181  | -2.52541 | -1.69515 |
| H | 3.23726  | -3.39783 | -2.24116 |
| C | 4.31284  | -2.74393 | -0.53232 |
| C | 4.67681  | -4.05178 | 0.02877  |
| C | 5.32214  | -2.29546 | 1.38858  |
| N | 4.73112  | -1.71308 | 0.29795  |
| C | 5.29664  | -3.74849 | 1.22078  |
| C | 5.83716  | -1.5954  | 2.49851  |
| H | 6.22091  | -2.21529 | 3.30368  |
| C | 5.92337  | -0.21018 | 2.71302  |

|    |          |          |          |
|----|----------|----------|----------|
| C  | 6.43126  | 0.42411  | 3.92868  |
| N  | 5.55867  | 0.76673  | 1.8176   |
| C  | 5.82306  | 1.99289  | 2.4114   |
| C  | 5.6059   | 3.22172  | 1.76602  |
| H  | 5.9034   | 4.11177  | 2.31283  |
| Fe | 4.52276  | 0.34095  | 0.07515  |
| C  | 6.37632  | 1.7844   | 3.78391  |
| O  | 2.93665  | 0.41218  | 0.89471  |
| O  | 0.22036  | -3.23476 | 0.46414  |
| N  | -5.89016 | -0.25891 | -0.74218 |
| C  | -3.65226 | -0.19975 | 1.15604  |
| C  | -5.12973 | -0.30891 | 1.61109  |
| C  | -5.93954 | -1.06461 | 0.55416  |
| C  | -3.61651 | 0.589    | -0.17493 |
| C  | -2.87611 | 0.5881   | 2.23004  |
| C  | -5.26464 | -0.94656 | 3.00319  |
| C  | -3.0709  | -1.58776 | 0.87659  |
| C  | -5.41636 | -2.49185 | 0.38646  |
| C  | -4.48954 | -0.03811 | -1.2508  |
| C  | -2.98498 | -0.04248 | 3.62127  |
| C  | -4.45363 | -0.16731 | 4.04558  |
| C  | -3.90494 | -2.62896 | 0.4345   |
| C  | -1.68404 | -1.78534 | 0.91108  |
| C  | -6.79482 | -0.78849 | -1.8044  |
| C  | -3.3258  | -3.84421 | 0.03792  |
| C  | -1.12993 | -2.99974 | 0.51286  |
| C  | -1.95237 | -4.03992 | 0.06893  |
| C  | 1.09423  | -2.43894 | 1.14756  |
| H  | -5.52956 | 0.71352  | 1.67675  |
| H  | -7.00246 | -1.07286 | 0.81054  |



|   |           |          |          |
|---|-----------|----------|----------|
| H | -2.59558  | 0.64047  | -0.55792 |
| H | -3.95074  | 1.61423  | 0.01286  |
| H | -3.30604  | 1.59822  | 2.26615  |
| H | -1.83152  | 0.71979  | 1.933    |
| H | -4.90037  | -1.97915 | 2.97462  |
| H | -6.32265  | -0.98713 | 3.28747  |
| H | -5.80997  | -2.95104 | -0.52558 |
| H | -5.85816  | -3.07557 | 1.20305  |
| H | -4.56593  | 0.60909  | -2.12586 |
| H | -4.10051  | -1.00307 | -1.57332 |
| H | -2.4285   | 0.55945  | 4.34689  |
| H | -2.51899  | -1.03494 | 3.6099   |
| H | -4.53119  | -0.65945 | 5.02013  |
| H | -4.88401  | 0.83668  | 4.16517  |
| H | -1.02413  | -0.97436 | 1.18539  |
| H | -6.79518  | -0.07539 | -2.63067 |
| H | -7.79915  | -0.87586 | -1.38908 |
| H | -6.42124  | -1.74704 | -2.16192 |
| H | -3.96836  | -4.65171 | -0.30327 |
| H | -1.50285  | -4.97595 | -0.2426  |
| H | 0.75187   | -1.99128 | 2.07586  |
| H | 2.47186   | -0.41455 | 0.68134  |
| H | 2.12033   | -2.75524 | 1.01866  |
| H | -6.25109  | 0.6926   | -0.50676 |
| O | -6.59005  | 2.39365  | -0.36229 |
| H | -7.07305  | 2.77866  | -1.10488 |
| H | -5.815    | 2.98895  | -0.20517 |
| H | -11.91299 | 0.18991  | -0.70233 |
| H | -3.32646  | -1.48335 | -4.16144 |
| H | -3.72266  | 3.73866  | 2.01891  |

|   |         |          |          |
|---|---------|----------|----------|
| H | 6.90478 | -1.82006 | -2.02584 |
| H | 5.12077 | 5.69912  | 0.17344  |
| H | 3.85525 | 5.08494  | -2.14899 |
| H | 1.92466 | 0.82212  | -4.42091 |
| H | 1.99929 | -1.85644 | -4.00652 |
| H | 4.47648 | -5.01383 | -0.41887 |
| H | 5.71022 | -4.44281 | 1.9416   |
| H | 6.78388 | -0.12947 | 4.78993  |
| H | 6.67023 | 2.56526  | 4.46952  |

The cartesian coordinates of the product complex in doublet spin state of **Dbl system**

${}^2\text{PC}_{\text{Dbl}}$

|   |           |          |          |
|---|-----------|----------|----------|
| C | -2.39509  | 1.73669  | 3.67515  |
| H | -2.39654  | 2.4638   | 2.85715  |
| H | -1.73871  | 2.13291  | 4.45878  |
| C | -1.9192   | 0.38218  | 3.19875  |
| C | -2.50914  | -0.79896 | 3.67132  |
| H | -3.31385  | -0.73672 | 4.40034  |
| C | -2.07308  | -2.04987 | 3.22826  |
| H | -2.53583  | -2.95139 | 3.62068  |
| C | -1.03587  | -2.13929 | 2.29638  |
| H | -0.68732  | -3.10932 | 1.95326  |
| C | -0.43627  | -0.97138 | 1.82078  |
| H | 0.36315   | -1.01689 | 1.09044  |
| C | -0.87209  | 0.2746   | 2.27404  |
| H | -0.38531  | 1.16825  | 1.90187  |
| C | -11.63903 | -0.3896  | -0.39909 |
| H | -12.20099 | -1.31309 | -0.55331 |
| H | -11.88936 | 0.31864  | -1.1939  |

|   |           |          |          |
|---|-----------|----------|----------|
| C | -10.12587 | -0.59537 | -0.38706 |
| O | -9.33816  | 0.30634  | -0.09579 |
| N | -9.68729  | -1.84099 | -0.71609 |
| H | -8.68802  | -2.00326 | -0.7707  |
| H | -10.31883 | -2.56207 | -1.0252  |
| C | -4.41595  | -4.23825 | -1.71984 |
| H | -5.35328  | -4.08555 | -2.25712 |
| H | -4.09318  | -5.27518 | -1.85724 |
| O | -4.68718  | -3.96542 | -0.33813 |
| H | -3.86059  | -3.96935 | 0.16123  |
| C | 7.672     | 1.20344  | 1.47121  |
| H | 8.62921   | 0.92088  | 1.91588  |
| H | 7.84306   | 1.84793  | 0.60763  |
| S | 6.89879   | -0.40167 | 0.95386  |
| N | 4.58066   | -2.37798 | 0.16291  |
| C | 5.01098   | -3.39836 | -0.6712  |
| C | 4.00213   | -2.99196 | 1.24746  |
| C | 4.72503   | -4.73083 | -0.04621 |
| C | 4.10338   | -4.4377  | 1.12866  |
| C | 3.33148   | -2.34452 | 2.28055  |
| H | 2.89565   | -2.97982 | 3.0453   |
| C | 3.13307   | -0.97442 | 2.44038  |
| N | 3.62776   | 0.02057  | 1.61383  |
| C | 3.24429   | 1.22513  | 2.21075  |
| C | 2.41983   | 0.97296  | 3.38315  |
| C | 2.37541   | -0.38803 | 3.52065  |
| C | 3.62376   | 2.48163  | 1.74605  |
| H | 3.27806   | 3.34188  | 2.30967  |
| C | 4.38074   | 2.72599  | 0.60453  |
| C | 4.70993   | 4.0572   | 0.07036  |

|    |          |          |          |
|----|----------|----------|----------|
| C  | 5.4023   | 2.34177  | -1.32046 |
| N  | 4.82638  | 1.71414  | -0.24191 |
| C  | 5.33973  | 3.79054  | -1.12422 |
| C  | 5.89938  | 1.68137  | -2.45867 |
| H  | 6.2965   | 2.32563  | -3.23773 |
| C  | 5.93095  | 0.30578  | -2.74041 |
| C  | 6.42976  | -0.28334 | -3.98268 |
| N  | 5.50956  | -0.69648 | -1.89653 |
| C  | 5.77479  | -1.90096 | -2.54336 |
| C  | 5.55836  | -3.15295 | -1.9425  |
| H  | 5.83434  | -4.02423 | -2.52933 |
| Fe | 4.85279  | -0.32447 | 0.014    |
| C  | 6.34239  | -1.64871 | -3.90811 |
| O  | 1.46044  | 0.51288  | -0.52675 |
| O  | 0.62506  | 2.70866  | -0.23003 |
| N  | -5.87929 | 0.40186  | 0.59767  |
| C  | -3.56748 | 0.22705  | -1.2024  |
| C  | -4.99757 | 0.55281  | -1.70338 |
| C  | -5.75992 | 1.316    | -0.61817 |
| C  | -3.68371 | -0.64936 | 0.06783  |
| C  | -2.84902 | -0.56912 | -2.30987 |
| C  | -4.98681 | 1.31242  | -3.0397  |
| C  | -2.83372 | 1.50624  | -0.79904 |
| C  | -5.07155 | 2.6474   | -0.30028 |
| C  | -4.53951 | -0.00729 | 1.14975  |
| C  | -2.80764 | 0.18024  | -3.64501 |
| C  | -4.22635 | 0.52595  | -4.11423 |
| C  | -3.55246 | 2.60455  | -0.30148 |
| C  | -1.4331  | 1.52755  | -0.7835  |
| C  | -6.78591 | 0.93338  | 1.65688  |

|   |          |          |          |
|---|----------|----------|----------|
| C | -2.83925 | 3.70706  | 0.19378  |
| C | -0.73698 | 2.63399  | -0.29484 |
| C | -1.45087 | 3.73309  | 0.2022   |
| C | 1.39595  | 1.80969  | -1.03654 |
| H | -5.5143  | -0.40397 | -1.87045 |
| H | -6.79731 | 1.48498  | -0.91991 |
| H | -2.69408 | -0.82906 | 0.49304  |
| H | -4.10778 | -1.62006 | -0.2024  |
| H | -3.4064  | -1.50402 | -2.45169 |
| H | -1.84536 | -0.86103 | -1.98713 |
| H | -4.50277 | 2.28586  | -2.90686 |
| H | -6.01718 | 1.50643  | -3.36017 |
| H | -5.43843 | 3.06303  | 0.64363  |
| H | -5.41392 | 3.35453  | -1.06552 |
| H | -4.73002 | -0.70327 | 1.96693  |
| H | -4.0682  | 0.88364  | 1.5613   |
| H | -2.29602 | -0.42861 | -4.39762 |
| H | -2.22225 | 1.09984  | -3.52944 |
| H | -4.19379 | 1.10341  | -5.04352 |
| H | -4.77072 | -0.40166 | -4.3394  |
| H | -0.87485 | 0.65559  | -1.09178 |
| H | -6.87828 | 0.17063  | 2.43173  |
| H | -7.76334 | 1.12192  | 1.21298  |
| H | -6.35495 | 1.83404  | 2.09164  |
| H | -3.38666 | 4.56446  | 0.5776   |
| H | -0.90309 | 4.58801  | 0.58269  |
| H | 0.93859  | 1.74425  | -2.02895 |
| H | 2.13536  | 0.47098  | 0.17355  |
| H | 2.3801   | 2.27546  | -1.09354 |
| H | -6.31231 | -0.48757 | 0.27093  |

|   |           |          |          |
|---|-----------|----------|----------|
| O | -6.65148  | -2.23164 | 0.15492  |
| H | -7.17272  | -2.60034 | 0.87934  |
| H | -5.92398  | -2.87939 | -0.01382 |
| H | -11.93735 | 0.0631   | 0.54904  |
| H | -3.40346  | 1.68149  | 4.09673  |
| H | -3.65786  | -3.56143 | -2.12541 |
| H | 7.06112   | 1.72033  | 2.21319  |
| H | 4.96681   | -5.68827 | -0.48418 |
| H | 3.72593   | -5.13049 | 1.86978  |
| H | 1.86062   | -0.96228 | 4.27901  |
| H | 1.97508   | 1.73654  | 4.00493  |
| H | 4.4713    | 5.00347  | 0.53187  |
| H | 5.72785   | 4.50716  | -1.83726 |
| H | 6.80328   | 0.30462  | -4.81183 |
| H | 6.62272   | -2.40556 | -4.62508 |

The cartesian coordinates of the reactant complex in quartet spin state of **Dbl system**

**<sup>4</sup>RC<sub>Dbl</sub>**

|   |          |          |         |
|---|----------|----------|---------|
| C | 2.3728   | -1.55637 | 4.12476 |
| H | 3.19037  | -0.92388 | 4.48553 |
| H | 2.80603  | -2.45614 | 3.67644 |
| C | 1.48843  | -0.82196 | 3.14275 |
| C | 1.35482  | 0.57392  | 3.18437 |
| H | 1.90963  | 1.13999  | 3.92965 |
| C | 0.50979  | 1.24061  | 2.29342 |
| H | 0.41256  | 2.32138  | 2.34919 |
| C | -0.22604 | 0.52402  | 1.34707 |
| H | -0.91502 | 1.02031  | 0.67172 |
| C | -0.10658 | -0.86475 | 1.30706 |

|   |          |          |          |
|---|----------|----------|----------|
| H | -0.69988 | -1.43859 | 0.60812  |
| C | 0.75199  | -1.52784 | 2.18374  |
| H | 0.84797  | -2.60853 | 2.12199  |
| C | 11.74491 | 0.44617  | 0.28688  |
| H | 12.0333  | 0.03362  | 1.2564   |
| H | 12.29336 | 1.37393  | 0.1104   |
| C | 10.22828 | 0.62252  | 0.26393  |
| O | 9.45551  | -0.29709 | 0.53524  |
| N | 9.77574  | 1.8625   | -0.07021 |
| H | 8.77574  | 2.01452  | -0.14182 |
| H | 10.40411 | 2.5958   | -0.35566 |
| C | 4.57111  | 4.25309  | -1.38079 |
| H | 5.10467  | 3.49233  | -1.95232 |
| H | 5.02239  | 5.23067  | -1.58274 |
| O | 4.6943   | 3.8907   | 0.00044  |
| H | 4.24228  | 4.54511  | 0.5472   |
| C | -7.61794 | -1.09027 | 1.58383  |
| H | -8.39737 | -0.82351 | 2.30261  |
| H | -8.08181 | -1.65827 | 0.77112  |
| S | -6.9388  | 0.46107  | 0.89183  |
| N | -4.41676 | 2.46213  | 0.24891  |
| C | -4.83543 | 3.44553  | -0.62831 |
| C | -3.92039 | 3.10261  | 1.3541   |
| C | -4.61825 | 4.79554  | -0.0168  |
| C | -4.05494 | 4.54139  | 1.19862  |
| C | -3.32884 | 2.48596  | 2.45606  |
| H | -2.95432 | 3.14619  | 3.2321   |
| C | -3.1384  | 1.12046  | 2.66739  |
| N | -3.58361 | 0.11032  | 1.85148  |
| C | -3.18526 | -1.07374 | 2.43966  |

|    |          |          |          |
|----|----------|----------|----------|
| C  | -2.42961 | -0.80198 | 3.65539  |
| C  | -2.42788 | 0.55575  | 3.79846  |
| C  | -3.51381 | -2.34998 | 1.98525  |
| H  | -3.18312 | -3.18714 | 2.59143  |
| C  | -4.23045 | -2.63939 | 0.83002  |
| C  | -4.61508 | -3.98499 | 0.3654   |
| C  | -5.21801 | -2.31538 | -1.12385 |
| N  | -4.63575 | -1.66212 | -0.06914 |
| C  | -5.21796 | -3.75426 | -0.85082 |
| C  | -5.69636 | -1.69212 | -2.29157 |
| H  | -6.07893 | -2.3602  | -3.05754 |
| C  | -5.73917 | -0.3248  | -2.60702 |
| C  | -6.20342 | 0.23177  | -3.87613 |
| N  | -5.36634 | 0.7048   | -1.77506 |
| C  | -5.58324 | 1.89179  | -2.46588 |
| C  | -5.35372 | 3.15932  | -1.90569 |
| H  | -5.6074  | 4.01319  | -2.52691 |
| Fe | -4.34579 | 0.39462  | -0.00285 |
| C  | -6.11373 | 1.59813  | -3.83385 |
| O  | -2.88673 | 0.38821  | -0.70551 |
| O  | -0.37076 | -3.15006 | -1.32943 |
| N  | 5.62347  | -0.25355 | 0.79508  |
| C  | 3.51517  | -0.0343  | -1.24269 |
| C  | 5.0227   | -0.11496 | -1.59641 |
| C  | 5.75231  | -0.96234 | -0.55132 |
| C  | 3.38308  | 0.6249   | 0.15369  |
| C  | 2.82736  | 0.86347  | -2.29035 |
| C  | 5.2577   | -0.62874 | -3.02489 |
| C  | 2.9127   | -1.43952 | -1.15489 |
| C  | 5.20638  | -2.39141 | -0.52373 |



|   |          |          |          |
|---|----------|----------|----------|
| C | 4.18745  | -0.09516 | 1.22688  |
| C | 3.0389   | 0.36736  | -3.72431 |
| C | 4.53442  | 0.2561   | -4.04755 |
| C | 3.70499  | -2.51279 | -0.71839 |
| C | 1.54309  | -1.6397  | -1.38446 |
| C | 6.48748  | -0.84749 | 1.85792  |
| C | 3.0958   | -3.75823 | -0.49924 |
| C | 0.95065  | -2.8854  | -1.16657 |
| C | 1.74029  | -3.95247 | -0.71127 |
| C | -1.19983 | -2.18718 | -1.98837 |
| H | 5.42965  | 0.90617  | -1.54311 |
| H | 6.8301   | -0.97122 | -0.73932 |
| H | 2.33784  | 0.62927  | 0.46966  |
| H | 3.71262  | 1.66889  | 0.09507  |
| H | 3.25641  | 1.86855  | -2.19534 |
| H | 1.76344  | 0.97354  | -2.06099 |
| H | 4.88161  | -1.65349 | -3.11396 |
| H | 6.33365  | -0.66073 | -3.23387 |
| H | 5.51793  | -2.91203 | 0.38757  |
| H | 5.71816  | -2.92504 | -1.33414 |
| H | 4.19335  | 0.46672  | 2.1627   |
| H | 3.79173  | -1.09015 | 1.42931  |
| H | 2.54782  | 1.04623  | -4.4294  |
| H | 2.56399  | -0.61299 | -3.84526 |
| H | 4.68058  | -0.14433 | -5.05577 |
| H | 4.98404  | 1.25944  | -4.04089 |
| H | 0.92414  | -0.81112 | -1.69713 |
| H | 6.39219  | -0.22966 | 2.75263  |
| H | 7.52207  | -0.84071 | 1.5066   |
| H | 6.15185  | -1.85777 | 2.08671  |

|   |          |          |          |
|---|----------|----------|----------|
| H | 3.70395  | -4.59343 | -0.16024 |
| H | 1.27068  | -4.91492 | -0.54109 |
| H | -0.79536 | -1.94009 | -2.97719 |
| H | -1.32978 | -1.27311 | -1.40152 |
| H | -2.17463 | -2.66265 | -2.09624 |
| H | 6.00562  | 0.70762  | 0.6507   |
| O | 6.74354  | 2.30387  | 0.62509  |
| H | 7.17557  | 2.55551  | 1.45133  |
| H | 6.05535  | 2.98886  | 0.44482  |
| H | 12.02349 | -0.28583 | -0.47607 |
| H | 1.80415  | -1.87834 | 5.00504  |
| H | 3.52258  | 4.25981  | -1.69451 |
| H | -6.83959 | -1.69125 | 2.05551  |
| H | -4.87185 | 5.73718  | -0.48145 |
| H | -3.74916 | 5.25866  | 1.94948  |
| H | -1.97034 | 1.1436   | 4.58246  |
| H | -1.99472 | -1.55553 | 4.29562  |
| H | -4.42958 | -4.91373 | 0.88335  |
| H | -5.63758 | -4.48888 | -1.52687 |
| H | -6.55593 | -0.37652 | -4.69968 |
| H | -6.3731  | 2.33445  | -4.57972 |

The cartesian coordinates of the transition state in quartet spin state of **Dbl** system

**<sup>4</sup>TS<sub>Dbl</sub>**

|   |          |          |          |
|---|----------|----------|----------|
| C | -2.54181 | -2.17576 | -3.75845 |
| H | -3.54119 | -1.88105 | -4.09507 |
| H | -2.64703 | -2.98285 | -3.02674 |
| C | -1.78087 | -1.00273 | -3.17587 |
| C | -1.95973 | 0.29166  | -3.68773 |
| H | -2.66008 | 0.44953  | -4.50497 |

|   |           |          |          |
|---|-----------|----------|----------|
| C | -1.24247  | 1.37268  | -3.17162 |
| H | -1.39221  | 2.36526  | -3.58762 |
| C | -0.32645  | 1.17736  | -2.1348  |
| H | 0.25636   | 2.00556  | -1.74552 |
| C | -0.13737  | -0.10389 | -1.6174  |
| H | 0.60228   | -0.25744 | -0.83934 |
| C | -0.86693  | -1.1797  | -2.12873 |
| H | -0.71843  | -2.17081 | -1.71106 |
| C | -11.87713 | 0.05543  | 0.04176  |
| H | -12.20345 | -0.45898 | -0.86467 |
| H | -12.44332 | 0.98225  | 0.15721  |
| C | -10.36769 | 0.27133  | -0.03673 |
| O | -9.58703  | -0.64121 | -0.3051  |
| N | -9.93305  | 1.53878  | 0.20891  |
| H | -8.93588  | 1.72272  | 0.2103   |
| H | -10.56726 | 2.27312  | 0.47789  |
| C | -4.7561   | 4.15998  | 1.12488  |
| H | -5.1492   | 3.36007  | 1.75377  |
| H | -5.27335  | 5.09275  | 1.37521  |
| O | -4.99684  | 3.7722   | -0.23346 |
| H | -4.66853  | 4.45876  | -0.82716 |
| C | 7.48463   | -1.24077 | -1.50363 |
| H | 8.30178   | -1.01829 | -2.19499 |
| H | 7.89766   | -1.7768  | -0.64353 |
| S | 6.79985   | 0.35584  | -0.92173 |
| N | 4.19208   | 2.38106  | -0.48233 |
| C | 4.61865   | 3.45578  | 0.26825  |
| C | 3.70241   | 2.88486  | -1.65761 |
| C | 4.39081   | 4.72634  | -0.49144 |
| C | 3.82703   | 4.33532  | -1.66863 |

|    |          |          |          |
|----|----------|----------|----------|
| C  | 3.14012  | 2.13294  | -2.68891 |
| H  | 2.76013  | 2.69157  | -3.53888 |
| C  | 2.97831  | 0.74557  | -2.74817 |
| N  | 3.44087  | -0.15984 | -1.82668 |
| C  | 3.029    | -1.40674 | -2.25571 |
| C  | 2.25149  | -1.28195 | -3.48    |
| C  | 2.25645  | 0.04835  | -3.79361 |
| C  | 3.37282  | -2.61797 | -1.65586 |
| H  | 3.03975  | -3.52324 | -2.15352 |
| C  | 4.12411  | -2.76657 | -0.49437 |
| C  | 4.56948  | -4.04144 | 0.08993  |
| C  | 5.17311  | -2.21356 | 1.37304  |
| N  | 4.52087  | -1.69264 | 0.28648  |
| C  | 5.21337  | -3.67211 | 1.24951  |
| C  | 5.66647  | -1.4532  | 2.45265  |
| H  | 6.09772  | -2.02385 | 3.27009  |
| C  | 5.67552  | -0.05853 | 2.62099  |
| C  | 6.15932  | 0.64545  | 3.80673  |
| N  | 5.24672  | 0.86527  | 1.69473  |
| C  | 5.45117  | 2.12565  | 2.24482  |
| C  | 5.17314  | 3.31906  | 1.55635  |
| H  | 5.42832  | 4.2404   | 2.07193  |
| Fe | 4.21791  | 0.34437  | -0.02944 |
| C  | 6.02975  | 1.99715  | 3.61889  |
| O  | 2.63965  | 0.41493  | 0.68565  |
| O  | 0.9889   | -2.54804 | 1.24367  |
| N  | -5.56047 | -0.47322 | -0.47025 |
| C  | -3.22908 | 0.13062  | 1.23514  |
| C  | -4.65546 | -0.10176 | 1.79848  |
| C  | -5.40315 | -1.09975 | 0.91075  |

|   |          |          |          |
|---|----------|----------|----------|
| C | -3.37315 | 0.68509  | -0.20582 |
| C | -2.53256 | 1.18363  | 2.12003  |
| C | -4.63649 | -0.53031 | 3.27307  |
| C | -2.46512 | -1.19546 | 1.16945  |
| C | -4.67979 | -2.44962 | 0.86668  |
| C | -4.2234  | -0.19797 | -1.10893 |
| C | -2.49547 | 0.78334  | 3.59917  |
| C | -3.90956 | 0.51394  | 4.13006  |
| C | -3.162   | -2.38201 | 0.8899   |
| C | -1.06676 | -1.22926 | 1.29045  |
| C | -6.49869 | -1.22035 | -1.36198 |
| C | -2.43723 | -3.56674 | 0.6889   |
| C | -0.36533 | -2.42421 | 1.12484  |
| C | -1.05504 | -3.59861 | 0.79577  |
| C | 1.74117  | -1.60195 | 1.93409  |
| H | -5.19037 | 0.85877  | 1.74337  |
| H | -6.42956 | -1.23759 | 1.26307  |
| H | -2.39163 | 0.78579  | -0.67095 |
| H | -3.81844 | 1.68544  | -0.16611 |
| H | -3.09291 | 2.12016  | 2.02199  |
| H | -1.52909 | 1.39855  | 1.74089  |
| H | -4.12317 | -1.493   | 3.37142  |
| H | -5.66315 | -0.67479 | 3.63003  |
| H | -5.02165 | -3.0504  | 0.01789  |
| H | -5.01849 | -3.003   | 1.75098  |
| H | -4.41597 | 0.28903  | -2.06604 |
| H | -3.74806 | -1.15757 | -1.30651 |
| H | -2.01524 | 1.57398  | 4.1849   |
| H | -1.88229 | -0.11668 | 3.72146  |
| H | -3.87044 | 0.17883  | 5.17127  |

|   |           |          |          |
|---|-----------|----------|----------|
| H | -4.48563  | 1.45014  | 4.12411  |
| H | -0.51284  | -0.32004 | 1.47876  |
| H | -6.52652  | -0.70567 | -2.3237  |
| H | -7.49624  | -1.20736 | -0.91433 |
| H | -6.14013  | -2.2369  | -1.51393 |
| H | -2.97265  | -4.48566 | 0.4637   |
| H | -0.49431  | -4.51605 | 0.65687  |
| H | 1.18882   | -1.1004  | 2.73328  |
| H | 2.22323   | -0.57344 | 1.16371  |
| H | 2.6682    | -2.07008 | 2.25617  |
| H | -6.02229  | 0.45416  | -0.34536 |
| O | -6.92541  | 1.96071  | -0.60716 |
| H | -7.35872  | 2.02794  | -1.46743 |
| H | -6.31047  | 2.72905  | -0.53575 |
| H | -12.09352 | -0.60266 | 0.88802  |
| H | -2.02061  | -2.5922  | -4.6282  |
| H | -3.68494  | 4.27066  | 1.31991  |
| H | 6.72104   | -1.8515  | -1.98701 |
| H | 4.6441    | 5.71628  | -0.14052 |
| H | 3.52063   | 4.9619   | -2.49651 |
| H | 1.77895   | 0.53657  | -4.63224 |
| H | 1.80429   | -2.10494 | -4.01868 |
| H | 4.40122   | -5.02447 | -0.32363 |
| H | 5.68602   | -4.32222 | 1.97529  |
| H | 6.55269   | 0.14098  | 4.68051  |
| H | 6.28873   | 2.81633  | 4.2729   |

The cartesian coordinates of the intermediate state in quartet spin state of **Dbl system**

**$^4\text{IM}_{\text{Dbl}}$**

|   |           |          |          |
|---|-----------|----------|----------|
| C | -2.38754  | -1.59749 | -4.05854 |
| H | -3.2305   | -1.00327 | -4.42565 |
| H | -2.78402  | -2.49379 | -3.57093 |
| C | -1.50814  | -0.80025 | -3.11864 |
| C | -1.40217  | 0.59458  | -3.23232 |
| H | -1.97293  | 1.11032  | -4.00169 |
| C | -0.56575  | 1.32388  | -2.38327 |
| H | -0.49129  | 2.40193  | -2.49688 |
| C | 0.18898   | 0.67255  | -1.40484 |
| H | 0.87316   | 1.21086  | -0.75755 |
| C | 0.09753   | -0.71398 | -1.2909  |
| H | 0.70996   | -1.22557 | -0.55855 |
| C | -0.75089  | -1.44006 | -2.12873 |
| H | -0.82155  | -2.51857 | -2.01436 |
| C | -11.74883 | 0.47312  | -0.23144 |
| H | -12.0192  | 0.01235  | -1.18433 |
| H | -12.2973  | 1.4101   | -0.11386 |
| C | -10.23317 | 0.64597  | -0.18655 |
| O | -9.45925  | -0.29047 | -0.39038 |
| N | -9.78106  | 1.90056  | 0.08676  |
| H | -8.78201  | 2.0509   | 0.17302  |
| H | -10.41113 | 2.64959  | 0.32381  |
| C | -4.56319  | 4.27909  | 1.38423  |
| H | -5.08886  | 3.53294  | 1.98193  |
| H | -5.03727  | 5.25492  | 1.5354   |
| O | -4.65767  | 3.85223  | 0.01865  |
| H | -4.19968  | 4.48512  | -0.54847 |
| C | 7.60769   | -1.12977 | -1.53583 |
| H | 8.6421    | -0.91962 | -1.82021 |
| H | 7.59793   | -1.89022 | -0.75136 |

|    |         |          |          |
|----|---------|----------|----------|
| S  | 6.92266 | 0.4556   | -0.90232 |
| N  | 4.40803 | 2.46692  | -0.26228 |
| C  | 4.83278 | 3.44377  | 0.62611  |
| C  | 3.93164 | 3.09772  | -1.38593 |
| C  | 4.62582 | 4.7816   | 0.00262  |
| C  | 4.07515 | 4.53344  | -1.22196 |
| C  | 3.34788 | 2.47124  | -2.48879 |
| H  | 2.97193 | 3.12602  | -3.2685  |
| C  | 3.16389 | 1.09901  | -2.69435 |
| N  | 3.62623 | 0.1014   | -1.87688 |
| C  | 3.20485 | -1.10403 | -2.40939 |
| C  | 2.41742 | -0.85081 | -3.60389 |
| C  | 2.42131 | 0.50361  | -3.78905 |
| C  | 3.51302 | -2.37474 | -1.92942 |
| H  | 3.16259 | -3.21346 | -2.52231 |
| C  | 4.22429 | -2.67175 | -0.7655  |
| C  | 4.59872 | -4.00262 | -0.28119 |
| C  | 5.22683 | -2.33297 | 1.18981  |
| N  | 4.63021 | -1.70934 | 0.12932  |
| C  | 5.213   | -3.77186 | 0.93271  |
| C  | 5.71459 | -1.68032 | 2.34258  |
| H  | 6.11326 | -2.33527 | 3.11192  |
| C  | 5.7483  | -0.30914 | 2.65158  |
| C  | 6.22186 | 0.26008  | 3.91332  |
| N  | 5.36173 | 0.72248  | 1.83592  |
| C  | 5.57326 | 1.90755  | 2.49383  |
| C  | 5.34102 | 3.17061  | 1.90756  |
| H  | 5.59767 | 4.03438  | 2.51348  |
| Fe | 4.42868 | 0.43068  | -0.04351 |
| C  | 6.11772 | 1.62313  | 3.85326  |



|   |          |          |          |
|---|----------|----------|----------|
| O | 2.79211  | 0.34197  | 0.72918  |
| O | 0.29983  | -3.28245 | 1.12388  |
| N | -5.66998 | -0.26036 | -0.76599 |
| C | -3.48342 | -0.04199 | 1.18788  |
| C | -4.97784 | -0.057   | 1.60024  |
| C | -5.77637 | -0.91118 | 0.61173  |
| C | -3.3851  | 0.57722  | -0.22844 |
| C | -2.71888 | 0.85608  | 2.18091  |
| C | -5.17682 | -0.51376 | 3.05363  |
| C | -2.93573 | -1.47081 | 1.11479  |
| C | -5.28784 | -2.3602  | 0.6243   |
| C | -4.24598 | -0.1498  | -1.25015 |
| C | -2.89535 | 0.41278  | 3.63646  |
| C | -4.38068 | 0.37411  | 4.01799  |
| C | -3.78517 | -2.53236 | 0.7582   |
| C | -1.56251 | -1.71232 | 1.26545  |
| C | -6.57545 | -0.87731 | -1.78085 |
| C | -3.23644 | -3.806   | 0.54652  |
| C | -1.03914 | -2.98608 | 1.0521   |
| C | -1.87671 | -4.04305 | 0.68429  |
| C | 1.16952  | -2.47367 | 1.79226  |
| H | -5.34847 | 0.97604  | 1.52663  |
| H | -6.84658 | -0.87155 | 0.83523  |
| H | -2.35269 | 0.55082  | -0.58089 |
| H | -3.68773 | 1.6297   | -0.18068 |
| H | -3.10965 | 1.87517  | 2.0688   |
| H | -1.66127 | 0.91509  | 1.90775  |
| H | -4.83761 | -1.54921 | 3.16581  |
| H | -6.24426 | -0.49657 | 3.30351  |
| H | -5.65762 | -2.90783 | -0.248   |

|   |           |          |          |
|---|-----------|----------|----------|
| H | -5.78015  | -2.83858 | 1.47971  |
| H | -4.27085  | 0.38595  | -2.20091 |
| H | -3.88412  | -1.16034 | -1.44    |
| H | -2.34993  | 1.09097  | 4.30083  |
| H | -2.45682  | -0.58293 | 3.77208  |
| H | -4.50473  | 0.01361  | 5.04399  |
| H | -4.78938  | 1.39442  | 3.99318  |
| H | -0.88659  | -0.89856 | 1.48723  |
| H | -6.50699  | -0.28489 | -2.69499 |
| H | -7.59718  | -0.85385 | -1.39474 |
| H | -6.25316  | -1.89545 | -1.99383 |
| H | -3.89223  | -4.62722 | 0.2693   |
| H | -1.44915  | -5.02512 | 0.51703  |
| H | 0.79244   | -1.91584 | 2.64439  |
| H | 2.6186    | -0.55834 | 1.05533  |
| H | 2.18248   | -2.85557 | 1.76654  |
| H | -6.02945  | 0.7135   | -0.64461 |
| O | -6.74381  | 2.31341  | -0.59664 |
| H | -7.17525  | 2.57969  | -1.41871 |
| H | -6.0391   | 2.98248  | -0.41708 |
| H | -12.04558 | -0.21831 | 0.56188  |
| H | -1.82457  | -1.93236 | -4.93756 |
| H | -3.51973  | 4.32216  | 1.71157  |
| H | 7.05289   | -1.48838 | -2.40513 |
| H | 4.87783   | 5.72553  | 0.46405  |
| H | 3.78463   | 5.25694  | -1.9728  |
| H | 1.94008   | 1.06871  | -4.5755  |
| H | 1.95663   | -1.61477 | -4.2133  |
| H | 4.40908   | -4.93897 | -0.7848  |
| H | 5.63022   | -4.5086  | 1.60767  |

|   |         |         |         |
|---|---------|---------|---------|
| H | 6.59009 | -0.334  | 4.74011 |
| H | 6.38121 | 2.36526 | 4.59258 |

The cartesian coordinates of the product complex in quartet spin state of **Dbl system**

**<sup>4</sup>PC<sub>Dbl</sub>**

|   |          |          |          |
|---|----------|----------|----------|
| C | 2.4213   | -1.7512  | 3.68056  |
| H | 3.43459  | -1.66232 | 4.08457  |
| H | 2.43413  | -2.47211 | 2.85707  |
| C | 1.88733  | -0.41237 | 3.22389  |
| C | 2.42189  | 0.78583  | 3.71834  |
| H | 3.22504  | 0.7479   | 4.45082  |
| C | 1.93222  | 2.02271  | 3.29233  |
| H | 2.35271  | 2.93775  | 3.70055  |
| C | 0.89832  | 2.08038  | 2.35475  |
| H | 0.50987  | 3.03862  | 2.02194  |
| C | 0.35581  | 0.89474  | 1.85497  |
| H | -0.43466 | 0.91754  | 1.11449  |
| C | 0.84261  | -0.3379  | 2.29311  |
| H | 0.40137  | -1.2472  | 1.90281  |
| C | 11.66856 | 0.32426  | -0.41151 |
| H | 11.97874 | -0.10942 | 0.54139  |
| H | 12.22543 | 1.24643  | -0.59055 |
| C | 10.15524 | 0.52665  | -0.38651 |
| O | 9.37494  | -0.35564 | -0.02658 |
| N | 9.70811  | 1.74898  | -0.7876  |
| H | 8.70786  | 1.90083  | -0.84675 |
| H | 10.33202 | 2.44701  | -1.15903 |
| C | 4.45598  | 4.18601  | -1.75037 |
| H | 5.2907   | 3.79636  | -2.33543 |

|   |          |          |          |
|---|----------|----------|----------|
| H | 4.34218  | 5.25422  | -1.96202 |
| O | 4.78453  | 3.96908  | -0.37199 |
| H | 4.01456  | 4.1521   | 0.18038  |
| C | -7.64646 | -1.20255 | 1.4782   |
| H | -8.53647 | -1.02758 | 2.08696  |
| H | -7.92271 | -1.76665 | 0.58549  |
| S | -6.98926 | 0.45707  | 1.02463  |
| N | -4.28122 | 2.26119  | 0.5674   |
| C | -4.61517 | 3.47359  | -0.01639 |
| C | -3.65152 | 2.55674  | 1.75587  |
| C | -4.20133 | 4.59811  | 0.88006  |
| C | -3.6117  | 3.99593  | 1.95226  |
| C | -3.06005 | 1.63627  | 2.62203  |
| H | -2.55805 | 2.05263  | 3.4897   |
| C | -3.02386 | 0.24435  | 2.50691  |
| N | -3.62839 | -0.4845  | 1.50425  |
| C | -3.44016 | -1.8213  | 1.8129   |
| C | -2.63817 | -1.93174 | 3.00696  |
| C | -2.38652 | -0.65565 | 3.43676  |
| C | -3.97283 | -2.89608 | 1.09617  |
| H | -3.75454 | -3.8887  | 1.47649  |
| C | -4.72064 | -2.81661 | -0.07631 |
| C | -5.18651 | -3.95537 | -0.88439 |
| C | -5.64056 | -1.91441 | -1.88972 |
| N | -5.01891 | -1.60591 | -0.70026 |
| C | -5.7481  | -3.36787 | -1.99891 |
| C | -6.01616 | -0.97381 | -2.86845 |
| H | -6.46495 | -1.39316 | -3.76447 |
| C | -5.88427 | 0.42894  | -2.86169 |
| C | -6.30157 | 1.32557  | -3.94048 |

|    |          |          |          |
|----|----------|----------|----------|
| N  | -5.38364 | 1.17453  | -1.82852 |
| C  | -5.49885 | 2.50195  | -2.17786 |
| C  | -5.16639 | 3.56222  | -1.30873 |
| H  | -5.34921 | 4.56468  | -1.68534 |
| Fe | -4.90821 | 0.3074   | 0.07085  |
| C  | -6.06865 | 2.61565  | -3.5484  |
| O  | -1.4886  | -0.49286 | -0.58693 |
| O  | -0.66281 | -2.69787 | -0.35158 |
| N  | 5.84349  | -0.39639 | 0.64883  |
| C  | 3.54618  | -0.18416 | -1.1631  |
| C  | 4.97879  | -0.50847 | -1.65849 |
| C  | 5.7289   | -1.29267 | -0.57977 |
| C  | 3.65439  | 0.66942  | 0.12448  |
| C  | 2.84157  | 0.63492  | -2.26277 |
| C  | 4.97513  | -1.24561 | -3.0072  |
| C  | 2.80459  | -1.46937 | -0.79443 |
| C  | 5.0327   | -2.62523 | -0.28533 |
| C  | 4.50083  | 0.00385  | 1.20032  |
| C  | 2.80774  | -0.09022 | -3.61159 |
| C  | 4.22849  | -0.43631 | -4.07445 |
| C  | 3.51406  | -2.57863 | -0.30813 |
| C  | 1.40423  | -1.49344 | -0.81155 |
| C  | 6.75121  | -0.93982 | 1.70061  |
| C  | 2.79199  | -3.69224 | 0.14809  |
| C  | 0.69928  | -2.61389 | -0.36912 |
| C  | 1.40405  | -3.72137 | 0.12258  |
| C  | -1.41082 | -1.76695 | -1.14474 |
| H  | 5.50181  | 0.44796  | -1.80553 |
| H  | 6.76765  | -1.46261 | -0.87678 |
| H  | 2.66145  | 0.84281  | 0.54516  |

|   |          |          |          |
|---|----------|----------|----------|
| H | 4.08111  | 1.64576  | -0.12297 |
| H | 3.40487  | 1.56847  | -2.38317 |
| H | 1.8367   | 0.92654  | -1.94338 |
| H | 4.48484  | -2.21848 | -2.89489 |
| H | 6.00717  | -1.43995 | -3.32223 |
| H | 5.38549  | -3.05092 | 0.65962  |
| H | 5.38337  | -3.32608 | -1.05261 |
| H | 4.68587  | 0.68216  | 2.03392  |
| H | 4.02493  | -0.89437 | 1.58976  |
| H | 2.30685  | 0.53549  | -4.35763 |
| H | 2.21589  | -1.00814 | -3.51865 |
| H | 4.20084  | -0.99702 | -5.01411 |
| H | 4.78033  | 0.49192  | -4.27848 |
| H | 0.85154  | -0.61562 | -1.11257 |
| H | 6.83329  | -0.19246 | 2.49153  |
| H | 7.73209  | -1.11059 | 1.25604  |
| H | 6.32931  | -1.85402 | 2.11574  |
| H | 3.33243  | -4.5574  | 0.52438  |
| H | 0.84959  | -4.58604 | 0.4699   |
| H | -0.92777 | -1.66703 | -2.12218 |
| H | -2.18071 | -0.48945 | 0.10089  |
| H | -2.39323 | -2.2298  | -1.24474 |
| H | 6.27772  | 0.49718  | 0.33027  |
| O | 6.68796  | 2.18365  | 0.13467  |
| H | 7.26273  | 2.55273  | 0.81729  |
| H | 5.98048  | 2.85544  | -0.02329 |
| H | 11.9124  | -0.39777 | -1.19618 |
| H | 1.79475  | -2.17782 | 4.47265  |
| H | 3.54267  | 3.65625  | -2.0363  |
| H | -6.91617 | -1.7662  | 2.06203  |

|   |          |          |          |
|---|----------|----------|----------|
| H | -4.34424 | 5.64821  | 0.66987  |
| H | -3.1726  | 4.47343  | 2.81889  |
| H | -1.81882 | -0.34531 | 4.30322  |
| H | -2.32841 | -2.86308 | 3.46114  |
| H | -5.07599 | -4.99991 | -0.63511 |
| H | -6.19116 | -3.8705  | -2.84966 |
| H | -6.72663 | 0.99145  | -4.87845 |
| H | -6.26221 | 3.53703  | -4.07834 |
